# Supplementary material
Source: PubMed Central journal article supplement (PMC9832916)
Supplement: NIHMS1852973-supplement-Supplement.pdf [file NIHMS1852973-supplement-Supplement.pdf]

## Supplementary Appendix

Supplement to: The GRADE Study Research Group. Glycemia reduction in type 2 diabetes — microvascular and cardiovascular outcomes. *N Engl J Med* 2022;387:1075-88. DOI: 10.1056/NEJMoa2200436

This appendix has been provided by the authors to give readers additional information about the work.

# Supplementary Appendix

## Glycemia Reduction Approaches in Type 2 Diabetes: A Comparative Effectiveness (GRADE) Study Microvascular and Cardiovascular Outcomes

GRADE Study Research Group

Writing Committee: David M. Nathan, John M. Lachin, John B. Buse, Henry B. Burch, Steven E. Kahn, Andrea L. Cherrington, Stephen P. Fortmann, Jennifer B. Green, M. Sue Kirkman, Heidi Krause-Steinrauf, Mary E. Larkin, Lawrence S. Phillips, Rodica Pop-Busui, Michael Steffes, Margaret Tiktin, Deborah J. Wexler, Ionut Bebu, Mark Tripputi, Naji Younes

### Table of Contents

|                                                                                                                                                                                           |    |
|-------------------------------------------------------------------------------------------------------------------------------------------------------------------------------------------|----|
| Section S1. GRADE Research Group .....                                                                                                                                                    | 2  |
| Section S2. Author Contribution Statement .....                                                                                                                                           | 6  |
| Section S3. Laboratory Methods. GRADE Central Biochemical Laboratory Assays and Quality Control.....                                                                                      | 7  |
| Section S4. Summary of Other Measurement Methods Relevant to Microvascular and Cardiovascular Outcomes.....                                                                               | 8  |
| Section S5. Categorization of Subgroups Based on Baseline Variables.....                                                                                                                  | 9  |
| Figure S1. Consolidated Standards of Reporting Trials (CONSORT) Diagram.....                                                                                                              | 10 |
| Figure S2. Per-protocol Cumulative Incidence of Microvascular Outcomes.....                                                                                                               | 11 |
| Figure S3. Per-protocol Cumulative Incidence of Heart Failure, any Cardiovascular Disease (CVD) Events, Major Adverse Cardiovascular Events (MACE), CV Death and All-cause Mortality..... | 12 |
| Table S1. Selected Baseline Characteristics of the Study Cohort.....                                                                                                                      | 13 |
| Table S2. Comparison with Type 2 Diabetes in US (NHANES 2018).....                                                                                                                        | 15 |
| Table S3. Per-protocol Analyses of Microvascular Outcomes.....                                                                                                                            | 17 |
| Table S4. Per-protocol Analyses of Cardiovascular Outcomes.....                                                                                                                           | 19 |
| Table S5. Subgroup Analyses of Outcomes.....                                                                                                                                              | 21 |

## Section S1. GRADE Research Group

**Designations:** Principal Investigator (PI); Co-Principal Investigator (Co-PI); Co-Investigator (Co-I); Study Coordinator (SC); Recruitment/Retention Coordinator (RC); Research Staff (RS)

### Current Clinical Centers

**Albert Einstein College of Medicine:** Crandall, JP (PI); McKee, MD (Co-PI, past); Behringer-Massera, S (Co-I, past); Brown-Friday, J (SC); Xhori, E (RC, past); Ballentine-Cargill, K (RS); Duran, S (RS); Estrella, H (RS); Gonzalez de la torre, S (RS, past); Lukin, J (RS, past)

**Atlanta VA Medical Center:** Phillips, LS (PI); Burgess, E (Co-I); Olson, D (Co-I); Rhee, M (Co-I); Wilson, P (Co-I); Raines, TS (SC); Boers, J (SC); Costello, J (SC); Maher-Albertelli, M (SC); Mungara, R (SC); Savoye, L (SC, past); White, CA (SC); Gullett, C (SC, past); Holloway, L (SC, past); Morehead, F (SC, past); Person, S (SC, past); Sibymon, M (SC, past); Tanukonda, S (SC, past); Adams, C (RC, past); Ross, A (RC, past)

**Baylor College of Medicine:** Balasubramanyam, A (PI); Gaba, R (Co-I); Gonzalez Hattery, E (SC); Ideozu, A (SC); Jimenez, J (SC); Montes, G (RC); Wright, C (RS, past)

**Baylor Research Institute:** Hollander, P (PI); Roe, E (Co-I, past); Jackson, A (SC); Smiley, A (SC); Burt, P (SC, past); Estrada, L (RS); Chionh, K (RS, past)

**Case Western Reserve University/Cleveland VA/MetroHealth Medical Center:** Ismail-Beigi, F (PI); Falck-Ytter, C (Co-PI); Sayyed Kassem, L (Co-PI); Sood, A (Co-PI, past); Tiktin, M (Co-I, SC); Kulow, T (SC); Newman, C (SC); Stancil, KA (SC); Cramer, B (SC, past); Iacoboni, J (SC, past); Kononets, MV (SC, past); Sanders, C (SC, past); Tucker, L (SC, past); Werner, A (SC, past); Maxwell, A (RS); McPhee, G (RS); Patel, C (RS); Colosimo, L (RS, past); Krol, A (RS, past)

**Columbia University Medical Center:** Goland, R (PI); Pring, J (SC); Alfano, L (SC); Kringas, P (SC, past); Hausheer, C (RC, past); Tejada, J (RC, past); Gumpel, K (RS, past); Kirpitch, A (RS, past); Schneier, H (RS, past)

**Duke University Medical Center:** Green, JB (PI); AbouAssi, H (Co-I); Chatterjee, R (Co-I); Feinglos, MN (Co-I, past); English Jones, J (SC, RC); Khan, SA (SC, RC); Kimpel, JB (SC, past); Zimmer, RP (SC, past); Furst, M (RC, past); Satterwhite, BM (RS); Thacker, CR (RS); Evans Kreider, K (RS, past)

**Indiana University:** Mariash, CN (PI); Mather, KJ (PI, past); Ismail, HM (Co-I); Lteif, A (Co-I, past); Mullen, M (SC); Hamilton, T (SC, past); Patel, N (SC, past); Riera, G (RC); Jackson, M (RC, past); Pirics, V (RC, past); Aguillar, D (RS, past); Howard, D (RS, past); Hurt, S (RS, past)

**International Diabetes Center:** Bergenstal, R (PI); Carlson, A (Co-I); Martens, T (Co-I); Johnson, M (SC); Hill, R (SC); Hyatt, J (SC); Jensen, C (SC); Madden, M (SC); Martin, D (SC); Willis, H (SC); Konerza, W (RS); Yang, S (RS); Kleeberger, K (RS, past); Passi, R (RS, past)

**Kaiser Permanente Northwest:** Fortmann, S (PI); Herson, M (Co-I); Mularski, K (Co-I); Glauber, H (Co-I, past); Pihoda, J (Co-I, past); Ash, B (SC); Carlson, C (SC); Ramey, PA (SC); Schield, E (SC); Torgrimson-Ojerio, B (SC); Arnold, K (SC, past); Kauffman, B (SC, past); Panos, E (SC, past); Sahnaw, S (RC); Bays, K (RS); Berame, K (RS); Cook, J (RS); Ghioni, D (RS); Gluth, J (RS); Schell, K (RS); Criscola, J (RS, past); Friason, C (RS, past); Jones, S (RS, past); Nazarov, S (RS, past)

**Kaiser Permanente of Georgia:** Barzilay, J (PI); Rassouli, N (Co-PI); Puttnam, R (Co-I); Ojoawo, B (SC); Nelson, R (RC); Curtis, M (SC, past); Hollis, B (SC, past); Sanders-Jones, C (SC, past); Stokes, K (SC, past); El-Haqq, Z (RS, past); Kolli, A (RS, past); Tran, T (RS, past)

**Massachusetts General Hospital:** Wexler, D (PI); Larkin, ME (Co-I, SC); Meigs, J (Co-I); Chambers, B (SC, past); Dushkin, A (SC, past); Rocchio, G (SC, past); Yepes, M (SC, past); Steiner, B (RC); Dulin, H (RC, past); Cayford, M (RS); Chu, K (RS); DeManbey, A (RS); Hillard, M (RS); Martin, K (RS); Thangthaeng, N (RS); Gurry, L (RS, past); Kochis, R (RS, past); Raymond, E (RS, past); Ripley, V (RS, past); Stevens, C (RS, past)

**MedStar Health Research Institute/ MedStar Baltimore:** Park, J (PI); Aroda, V (PI, past); Ghazi, A (Co-PI); Magee, M (Co-I); Rensing, Ann (Co-I); Loveland, A (SC); Hamm, M (SC); Hurtado, M (SC); Kuhn, A (SC); Leger, J (SC); Manandhar, L (SC); Mwicigi, F (SC); Sanchez, O (SC); Young, T (SC)

**Miami VA Healthcare System/University of Miami:** Garg, R (PI); Lagari-Libhaber, V (PI); Florez, HJ (PI, past); Valencia, WM (PI, past); Marks, J (Co-PI, past); Casula, S (Co-I); Oropesa-Gonzalez, L (SC); Hue, L (SC, past); Cuadot, A (SC, past); Nieto-Martinez, R (SC, past); Riccio Veliz, AK (SC, past); Gutt, M (RC, past); Kendal, YJ (RS, past); Veciana, B. (RS, past)

**Oregon Health & Science University:** Ahmann, A (PI); Aby-Daniel, D (Co-I); Joarder, F (Co-I); Morimoto, V (Co-I); Sprague, C (Co-I); Yamashita, D (Co-I); Cady, N (SC); Rivera-Eschright, N (SC); Kirchhoff, P (SC, past); Morales Gomez, B (RC); Adducci, J (RC, past); Goncharova, A (RC, past)

**Pacific Health Research and Education Institute/VA Pacific Islands:** Hox, SH (PI); Petrovitch, H (Co-PI); Matwichyna, M (SC); Jenkins, V (SC, past); Broadwater, L (RS); Ishii, RR (RS); Bermudez, NO (RS, past)

**Pennington Biomedical Research Center:** Hsia, DS (PI); Cefalu, WT (PI, past); Greenway, FL (Co-I); Waguespack, C (Co-I); King, E (SC); Fry, G (SC); Dragg, A (SC); Gildersleeve, B (SC); Arceneaux, J (SC); Haynes, N (SC, past); Thomassie, A (SC, past); Pavlionis, M (SC, past); Bourgeois, B (RC, past); Hazlett, C (RS)

**San Diego VA Medical Center:** Mudaliar, S (PI); Henry, R (PI, past); Boeder, S (Co-I, past); Pettus, J (Co-I, past); Diaz, E (SC); Garcia-Acosta, D (SC); Maggs, S (SC); DeLue, C (SC, past); Stallings, A (SC, past); Castro, E (RC, past); Hernandez, S (RC, past)

**Southwestern American Indian Center:** Krakoff, J (PI); Curtis, JM (Co-I); Killean, T (SC); Khalid, M (SC); Joshevama, E (RC, past); Diaz, E (RS); Martin, D (RS); Tsingine, K (RS); Karshner, T (RS, past)

**St. Luke's-Roosevelt Hospital:** Albu, J (Co-PI); Pi-Sunyer, FX (Co-PI, past); Frances, S (Co-I); Maggio, C (SC, past); Ellis, E (RC); Bastawrose, J (RC, past); Gong, X (RS)

**SUNY Downstate Medical Center/New York Hospital-Queens:** Banerji, MA (PI); August, P (Co-I); Lee, M (Co-I); Lorber, D (Co-I); Brown, NM (SC, RC); Josephson, DH (SC); Thomas, LL (SC, RC); Tsovian, M (SC, RC); Cherian, A (SC, RC, past); Jacobson, MH (RS); Mishko, MM (RS)

**The University of North Carolina Diabetes Care Center:** Kirkman, MS (PI); Buse, JB (Co-I); Dostou, J (Co-I); Machineni, S (Co-I); Young, L (Co-I); Bergamo, K (Co-I, past); Goley, A (Co-I, past); Kerr, J (Co-I, past); Largay, JF (Co-I, past); Guarda, S (SC); Cuffee, J (SC, past); Culmer, D (SC, past); Fraser, R (RC); Almeida, H (RC, past); Coffey, S (RC, past); Debnam, E (RC, past); Kiker, L (RC, past); Morton, S (RC, past); Josey, K (RS); Fuller, G (RS, past)

**University of Alabama Birmingham:** Garvey, WT (PI); Cherrington, AL (Co-PI); Dyer, D (SC); Lawson, MCR (SC); Griffith, O (SC, past); Agne, A (RC); McCullars, S (RC)

**University of Cincinnati/Cincinnati VA Medical Center:** Cohen, RM (PI); Craig, J (SC); Rogge, MC (SC, past); Burton, K (SC, past); Kersey, K (SC, RC, past); Wilson, C (SC, past); Lipp, S (RC, past); Vonder Meulen, MB (RC, past); Adkins, C (RS); Onadeko, T (RS)

**University of Colorado-Denver/VA:** Rasouli, N (PI); Baker, C (Co-I); Schroeder, E (Co-I, past); Razzaghi, M (Co-I); Lyon, C (Co-I, past); Penaloza, R (Co-I, past); Underkofler, C (SC); Lorch, R (SC); Douglass, S (SC, past); Steiner, S (SC, past)

**University of Iowa:** Sivitz, WI (PI); Cline, E (SC); Knosp, LK (SC); McConnell, J (SC, past); Lowe, T (RC)

**University of Michigan:** Herman, WH (PI); Pop-Busui, R (Co-PI); Tan, MH (Co-I); Martin, C (SC); Waltje, A (SC, RC); Katona, A (SC); Goodhall, L (SC, past); Eggleston, R (RC, past); Kuo, S (RS); Bojescu, S (RS, past); Bule, S (RS, past); Kessler, N (RS, past); LaSalle, E (RS, past); Whitley, K (RS, past)

**University of Minnesota:** Seaquist, ER (PI); Bantle, A (Co-I); Harindhanavudhi, T (Co-I); Kumar, A (Co-I); Redmon, B (Co-I); Bantle, J (Co-I, past); Coe, M (SC); Mech, M (SC); Taddese, A (RC); Lesne, L (RS); Smith, S (RS)

**University of Nebraska Medical Center/Omaha VA:** Desouza, C (PI); Kuechenmeister, L (Co-I); Shivaswamy, V (Co-I); Burbach, S (SC); Rodriguez, MG (SC); Seipel, K (SC); Alfred, A (SC, past); Morales, AL (SC, past); Eggert, J (RS); Lord, G (RS); Taylor, W (RS, past); Tillson, R (RS, past)

**University of New Mexico:** Schade, DS (PI); Adolphe, A (Co-PI); Burge, M (Co-PI, past); Duran-Valdez, E (SC); Martinez, J (RC, past); Bancroft, A (RS); Kunkel, S (RS); Ali Jamaledin Ahmad, F (RS, past); Hernandez McGinnis, D (RS, past); Pucchetti, B (RS, past); Scripsick, E (RS, past); Zamorano, A (RS, past)

**UT Health San Antonio:** DeFronzo, RA (PI); Cersosimo, E (Co-PI); Abdul-Ghani, M (Co-I); Triplitt, C (Co-I); Juarez, D (SC); Mullen, M (SC); Garza, RI (SC, past); Verastiqui, H (SC, past); Wright, K (RC, past); Puckett, C (RS)

**University of Texas-Southwestern Medical Center:** Raskin, P (PI); Rhee, C (Co-I, past); Abraham, S (SC); Jordan, LF (SC); Sao, S (SC); Morton, L (SC, past); Smith, O (SC, past); Osornio Walker, L (RC, past); Schnurr-Breen, L (RC, past); Ayala, R (RS); Kreymer, RB (RS); Sturgess, D (RS, past)

**VA Puget Sound Health Care System/University of Washington:** Utzschneider, KM (PI); Kahn, SE (Co-PI); Alarcon-Casas Wright, L (Co-I); Boyko, EJ (Co-I); Tsai, EC (Co-I); Trencle, DL (Co-I, past); Trikudanathan, S (Co-I, past); Fattaleh, BN (SC); Montgomery, BK (SC, past); Atkinson, KM (RS); Kozedub, A (RS); Concepcion, T (RS, past); Moak, C (RS, past); Prikhodko, N (RS, past); Rhothisen, S (RS, past)

**Vanderbilt University:** Elasy, TA (PI); Martin, S (SC); Shackelford, L (RC, RS, past); Goidel, R (RS); Hinkle, N (RS); Lovell, C (RS); Myers, J (RS); Lipps Hogan, J (RS, past)

**Washington University:** McGill, JB (PI); Salam, M (Co-I); Schweiger, T (SC, RC); Kissel, S (SC, RC, past); Recklein, C (SC, past); Clifton, MJ (RS)

**Yale University/Fair Haven Community Health Center/West Haven VA Medical Center:** Tamborlane, W (PI); Camp, A (Co-I); Gulanski, B (Co-I); Inzucchi, SE (Co-I); Pham, K (Co-I); Alguard, M (SC, RC); Gatcomb, P (SC); Lessard, K (SC); Perez, M (SC); Iannone, L (RC); Magenheimer, E (RC); Montosa, A (RC)

## Study Units

**NIH/NIDDK (Sponsor):** Cefalu, WT (Director, Division of Diabetes, Endocrinology and Metabolic Diseases); Fradkin, J (Director, Division of Diabetes, Endocrinology and Metabolic Diseases, past); Burch, HB (Project Scientist); Bremer, AA (Project Scientist, past)

**Chairman's Office, Massachusetts General Hospital, Harvard Medical School:** Nathan, DM (Study Chair, Study Co-PI)

**Executive Committee:** Nathan, DM (Study Chair, Study Co-PI); Lachin, JM (U01 Contact PI, Study Co-PI); Buse, JB (Co-I); Kahn, SE (Co-I); Krause-Steinrauf, H (Co-I, Project Director); Larkin, ME (Co-I, SC); Tiktin, M (Co-I, SC); Wexler, D (PI); Burch, HB (Program Scientist); Bremer, AA (Project Scientist, past)

**Coordinating Center, The George Washington University Biostatistics Center:** Lachin, JM (U01 Contact PI, Study Co-PI); Krause-Steinrauf, H (Co-I, Project Director); Younes, N (Co-I); Bebu, I (RS); Butera, N (RS); Buys, CJ (RS); Fagan, A (RS); Gao, Y (RS); Ghosh, A (RS); Gramzinski, MR (RS); Hall, SD (RS); Kazemi, E (RS); Legowski, E (RS); Liu, H (RS); Suratt, C (RS); Tripputi, M (RS); Arey, A (RS, past); Backman, M (RS, past); Bethepu, J (RS, past); Lund, C (RS, past); Mangat Dhaliwal, P (RS, past); McGee, P (RS, past); Mesimer, E (RS, past); Ngo, L (RS, past)

**Central Biochemical Laboratory, University of Minnesota Advanced Research and Diagnostic Laboratory:** Steffes, M (PI); Seegmiller, J (Co-I); Saenger, A (Co-I, past); Arends, V (SC); Gabrielson, D (SC, past)

**Drug Distribution Center, VA Cooperative Studies Program Clinical Research Pharmacy Coordinating Center:** Conner, T (PI); Warren, S (PI, past); Day, J (RS); Huminik, J (RS); Scrymgeour, A (RS)

**ECG Reading Center, EPICARE, Wake Forest University:** Soliman, EZ (PI); Pokharel, Y (PI, past); Zhang, ZM (Co-I, past); Campbell, C (SC); Hu, J (SC); Keasler, L (SC); Hensley, S (SC, past); Li, Y (RS)

### **Economic Evaluation and Assessment Center:**

**University of Michigan:** Herman, WH (PI); Kuo, S (RS); Martin, C (SC); Waltje, A (SC, RC); Mihalcea, R (RS); Min, DJ (RS); Perez-Rosas, V (RS); Prosser, L (RS); Resnicow, K (RS); Ye, W (RS)

**Centers for Disease Control and Prevention:** Shao, H (RS); Zhang, P (RS)

**Neurocognitive Coordinating Center, Columbia University Medical Center:** Luchsinger, J (PI); Sanchez, D (SC); Assuras, S (RS)

**QWB Reading Center, University of California San Diego Health Services Research Center:** Groessl, E (PI); Sakha, F (SC); Chong, H (SC, past); Hillery, N (RS)

## Collaborators

**Cardiovascular Adjudication Advisor:** Everett, BM (Brigham and Women's Hospital)

**Collaborating Investigators (Recruitment Sites):** Abdouch, I (University of Nebraska Medical Center/Omaha VA); Bahtiyar, G (SUNY Downstate Medical Center); Brantley, P (Pennington Biomedical Research Center (LSU)); Broyles, FE (Swedish Medical Center); Canaris, G (University of Nebraska Medical Center/Omaha VA); Copeland, P (Massachusetts General Hospital); Craine, JJ (UW Valley Medical Center); Fein, WL (Swedish Medical Center); Gliwa, A (SUNY Downstate Medical Center); Hope, L (SUNY Downstate Medical Center); Lee, MS (SUNY Downstate Medical Center); Meiners, R (Pennington Biomedical Research Center (LSU)); Meiners, V (Pennington Biomedical Research Center (LSU)); O'Neal, H (Pennington Biomedical Research Center (LSU)); Park, JE (UW Valley Medical Center); Sacerdote, A (SUNY Downstate Medical Center); Sledge, Jr., E (Pennington Biomedical Research Center (LSU)); Soni, L (SUNY Downstate Medical Center); Steppel-Reznik, J (Massachusetts General Hospital); Turchin, A (Massachusetts General Hospital)

**Beta Cell Ancillary Study:** Brooks-Worrell, B (University of Washington); Hampe, CS (University of Washington); Palmer, JP (University of Washington); Shojaie, A (University of Washington)

**Continuous Glucose Monitoring Sub-study:** Higgins, J (Massachusetts General Hospital; Harvard Medical School)

**Emotional Distress Sub-study:** Fischer, L (University of California, San Francisco); Golden, S (Johns Hopkins University); Gonzalez, J (Yeshiva University; Albert Einstein College of Medicine); Naik, A (Baylor College of Medicine); Walker, E (Albert Einstein College of Medicine)

**National Diabetes Education Program (NDEP) Sub-study:** Doner Lotenberg, L (Hager Sharp); Gallivan, JM (National Institutes of Health); Lim, J (Hager Sharp); Tuncer, DM (National Institutes of Health)

**Recruitment Ancillary Study:** Behringer-Massera, S (The Mount Sinai Hospital, Beth Israel Medical Center)

## **Section S2. Author Contribution Statement.**

All authors affirm that authorship is merited based on the ICMJE authorship criteria. David M. Nathan, John M. Lachin, John B. Buse, Steven E. Kahn, Heidi Krause-Steinrauf, Mary E. Larkin, Rodica Pop-Busui, and Deborah J. Wexler contributed to the conception and design of the research. David M. Nathan, John M. Lachin, John B. Buse, Andrea Cherrington, Stephen P. Fortmann, Jennifer B. Green, Steven E. Kahn, M. Sue Kirkman, Heidi Krause-Steinrauf, Mary E. Larkin, Lawrence S. Phillips, Rodica Pop-Busui, Michael Steffes, Margaret Tiktin, Deborah J. Wexler, and Naji Younes contributed to the acquisition of data. John M. Lachin, Heidi-Krause-Steinrauf, Ionut Bebu, Mark Tripputi, and Naji Younes contributed to the statistical analysis of data. David M. Nathan, John M. Lachin, John B. Buse, Henry B. Burch, Steven E. Kahn, Stephen P. Fortmann, Jennifer B. Green, M. Sue Kirkman, Heidi Krause-Steinrauf, Mary E. Larkin, Lawrence S. Phillips, Rodica Pop-Busui, Michael Steffes, Deborah J. Wexler, Margaret Tiktin, Mark Tripputi, and Naji Younes contributed to the interpretation of data and results. David M. Nathan, John M. Lachin, and John B. Buse contributed to the acquisition of funding. David M. Nathan, John M. Lachin, John B. Buse, Stephen P. Fortmann, Jennifer B. Green, M. Sue Kirkman, Heidi Krause-Steinrauf, Mary E. Larkin, Michael Steffes, Margaret Tiktin, and Deborah J. Wexler contributed to the supervision and management of the research. David M. Nathan, John M. Lachin, Ionut Bebu, Henry B. Burch, John B. Buse, Andrea L. Cherrington, Stephen P. Fortmann, Jennifer B. Green, Steven E. Kahn, M. Sue Kirkman, Heidi Krause-Steinrauf, Mary E. Larkin, Lawrence S. Phillips, Rodica Pop-Busui, Michael Steffes, Margaret Tiktin, Mark Tripputi, Deborah J. Wexler, and Naji Younes contributed to the drafting and the critical revision of the manuscript. John M. Lachin and David M. Nathan are the guarantors of this work and as such, had full access to all the data in the study and take responsibility for the integrity of the data and the accuracy of the data analysis. David M. Nathan, M.D. and John M. Lachin, Sc.D. wrote the first draft of the manuscript and decided to publish the paper.

### **Section S3. Laboratory Methods. GRADE Central Biochemical Laboratory Assays and Quality Control.**

Quality control was overseen by a committee composed of GRADE investigators who evaluated precision through inter-day coefficients of variation for each assay in the GRADE Central Biochemical Laboratory (CBL). Trueness was assessed by comparison of CBL results with the assigned values for reference materials, mostly procured from the National Institute of Standards and Technology (NIST).

Accuracy for all lipid measurements was also monitored quarterly through participation of the CBL in the CDC Lipid Standardization Program. Total Cholesterol (TC) was measured using a cholesterol oxidase method; HDL-Cholesterol (HDL-C) was measured using a direct method; and triglycerides were assayed using a glycerol-blanked enzymatic method. If the concentration of triglycerides was <400 mg/dL, LDL-C was calculated using the Friedewald equation as  $LDL-C = TC - HDL-C - \text{triglycerides}/5.0$ .

Creatinine was measured in serum and urine by an enzymatic method monitored quarterly in the CBL using NIST standard materials. Urine albumin was measured using an immunoturbidimetric method standardized against a reference preparation and also monitored quarterly in the CBL.



## **Section S4. Summary of Other Measurement Methods Relevant to Microvascular and Cardiovascular Outcomes.**

All assessments done at baseline. Following randomization, participants were seen at all sites

Quarterly with measurement of:

Hemoglobin A1c, blood pressure and weight using standardized methods. Assessment of adverse events, medical history and study drug adherence, concomitant non-study medications were recorded along with any history of GI distress, shortness of breath or hypoglycemia, using standardized forms.

IN ADDITION

Every 6 months:

Renal function was evaluated with serum creatinine (eGFR) and urine albumin:creatinine ratio (urine samples delayed in menstruating women).

Annually:

Fasting visits included lipids (after at least an 8 hour fast), peripheral neuropathy (ankle reflexes, light touch with 10-gram monofilament, vibration perception with 128 MHz tuning fork) and foot exam.

Bi-annually:

Waist:hip circumference, and electrocardiogram.

Other:

Height at year 4 and cognitive assessments at years 4 and 6.

## Section S5. Categorization of Subgroups Based on Baseline Variables.

### Demographic (based on self-report)

Age (tertiles): <45, 45-59, ≥60 years

Sex: Men, Women

Race: White, Black, Other

Ethnicity: Hispanic, Non-hispanic

Sex: Men, Women

Diabetes duration (tertiles): 0-2.5, >2.5-5.4, >5.4-11

### Clinical

BMI (tertiles): 18.2-30.7, 30.8-36.2, ≥36.3 kg/m<sup>2</sup>

HbA1c (tertiles): 6.8-7.2, 7.3-7.7, 7.8-8.5 %

**Figure S1. Consolidated Standards of Reporting Trials (CONSORT) Diagram.**

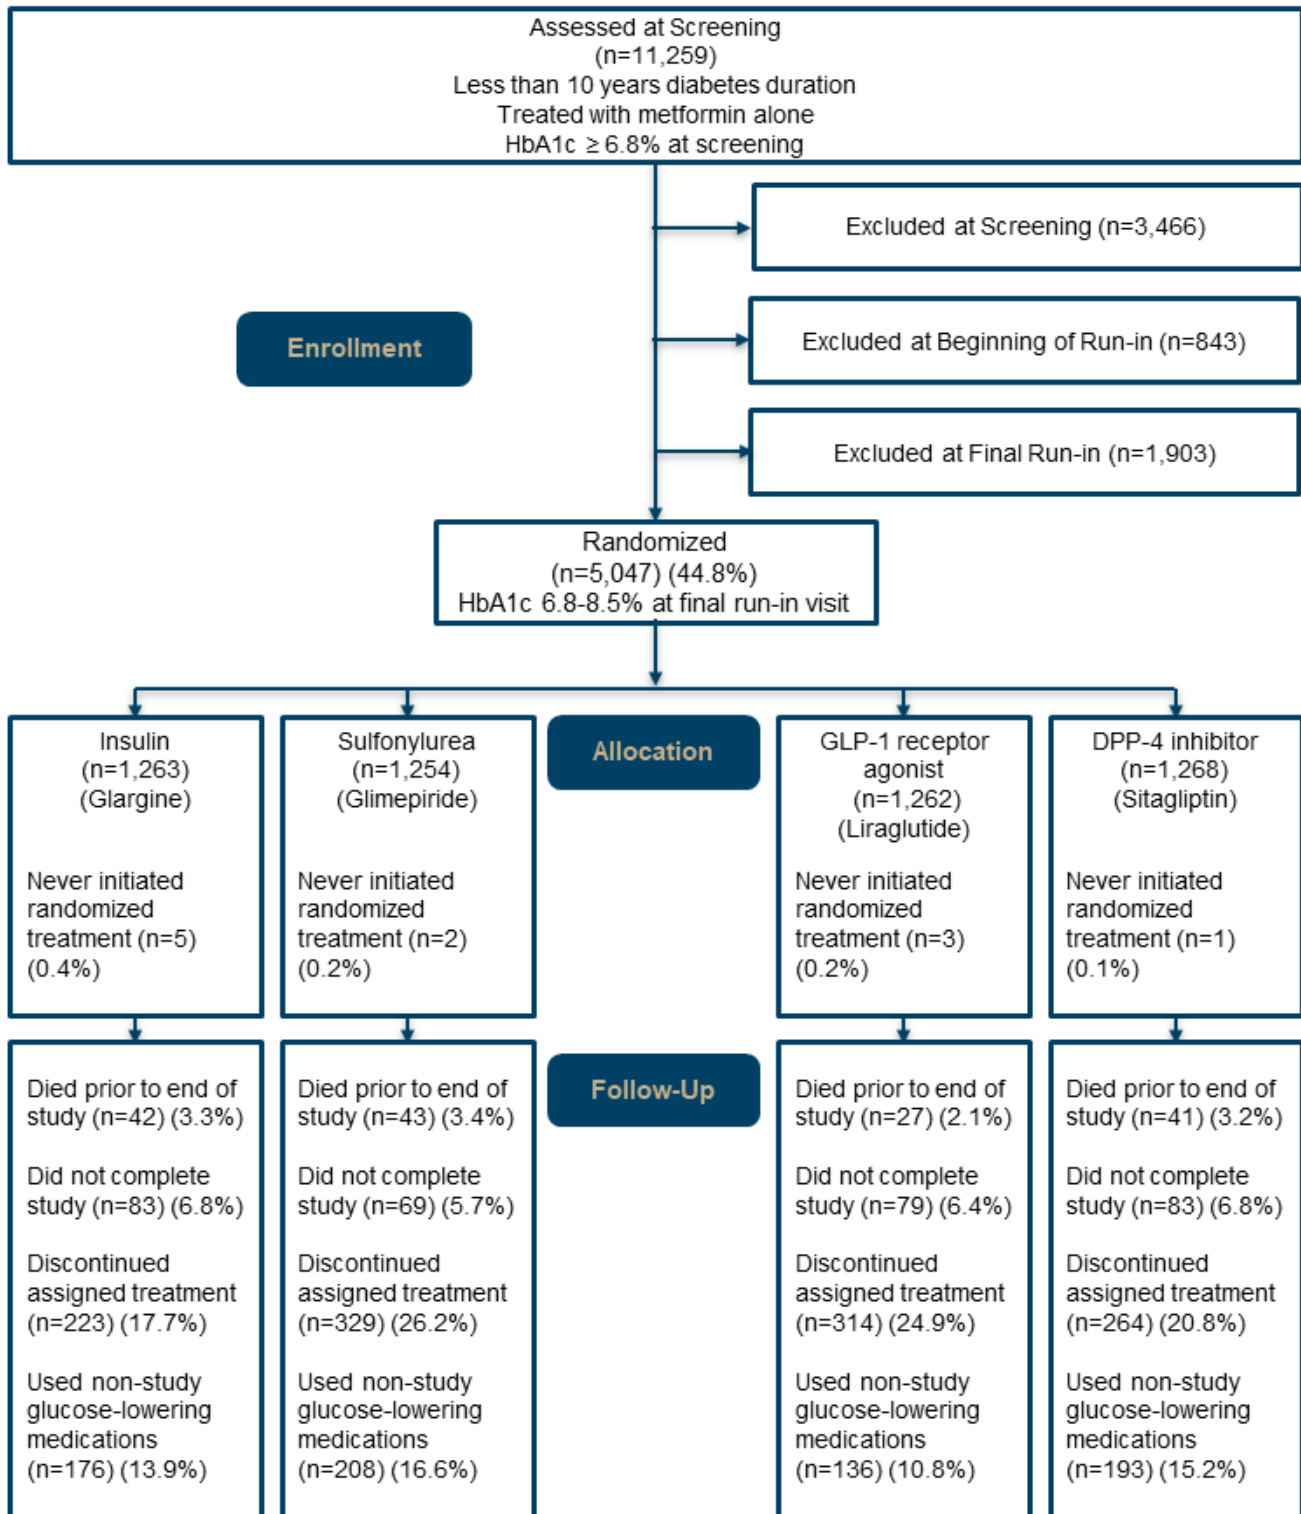

HbA1c (mmol/mol) = (HbA1c% \* 10.93) - 23.5

Completed Study refers to a subject who completed their last expected visit (i.e., close-out visit).

### Figure S2. Per-protocol Cumulative Incidence of Microvascular Outcomes.

Per-protocol cumulative incidence of confirmed moderately increased albuminuria, severely increased albuminuria, impaired eGFR <60 ml/min/1.73 m<sup>2</sup> and diabetic peripheral neuropathy (DPN) over 6.5 years of follow-up among those free of each condition at baseline. Participants who developed incident end-stage kidney disease (dialysis, transplantation or kidney disease mortality) during the study were included in each albuminuria outcome. The numbers plotted below the x-axis of each panel are the number of participants at risk for the outcome at each follow-up timepoint. Hazard ratio and other comparisons among groups are presented in Table S3.

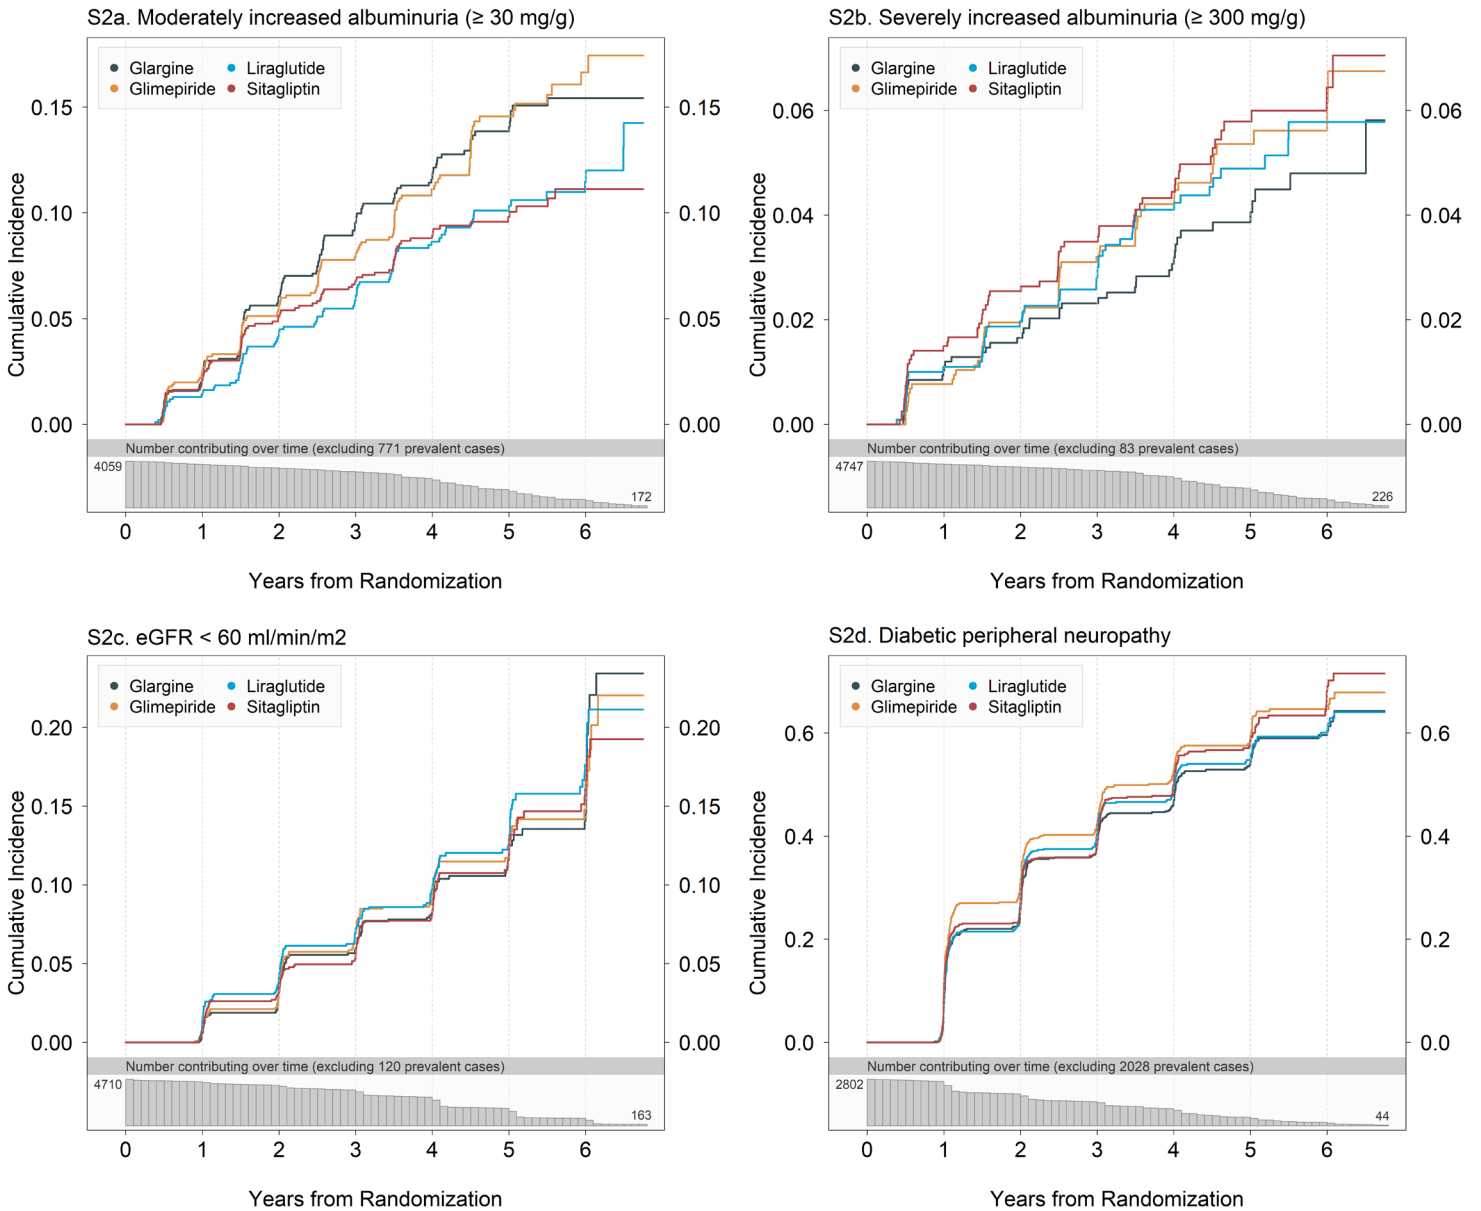

**Figure S3. Per-protocol Cumulative Incidence of Heart Failure, any Cardiovascular Disease (CVD) Events, Major Adverse Cardiovascular Events (MACE), CV Death and All-cause Mortality.**

Per-protocol cumulative incidence of heart failure, any CVD events, MACE, CV death and all-cause mortality over 6.5 years of follow-up. The numbers plotted below the x-axis of each panel are the number of participants at risk for the outcome at each follow-up timepoint. Hazard ratio and other comparisons among groups are presented in Table S4.

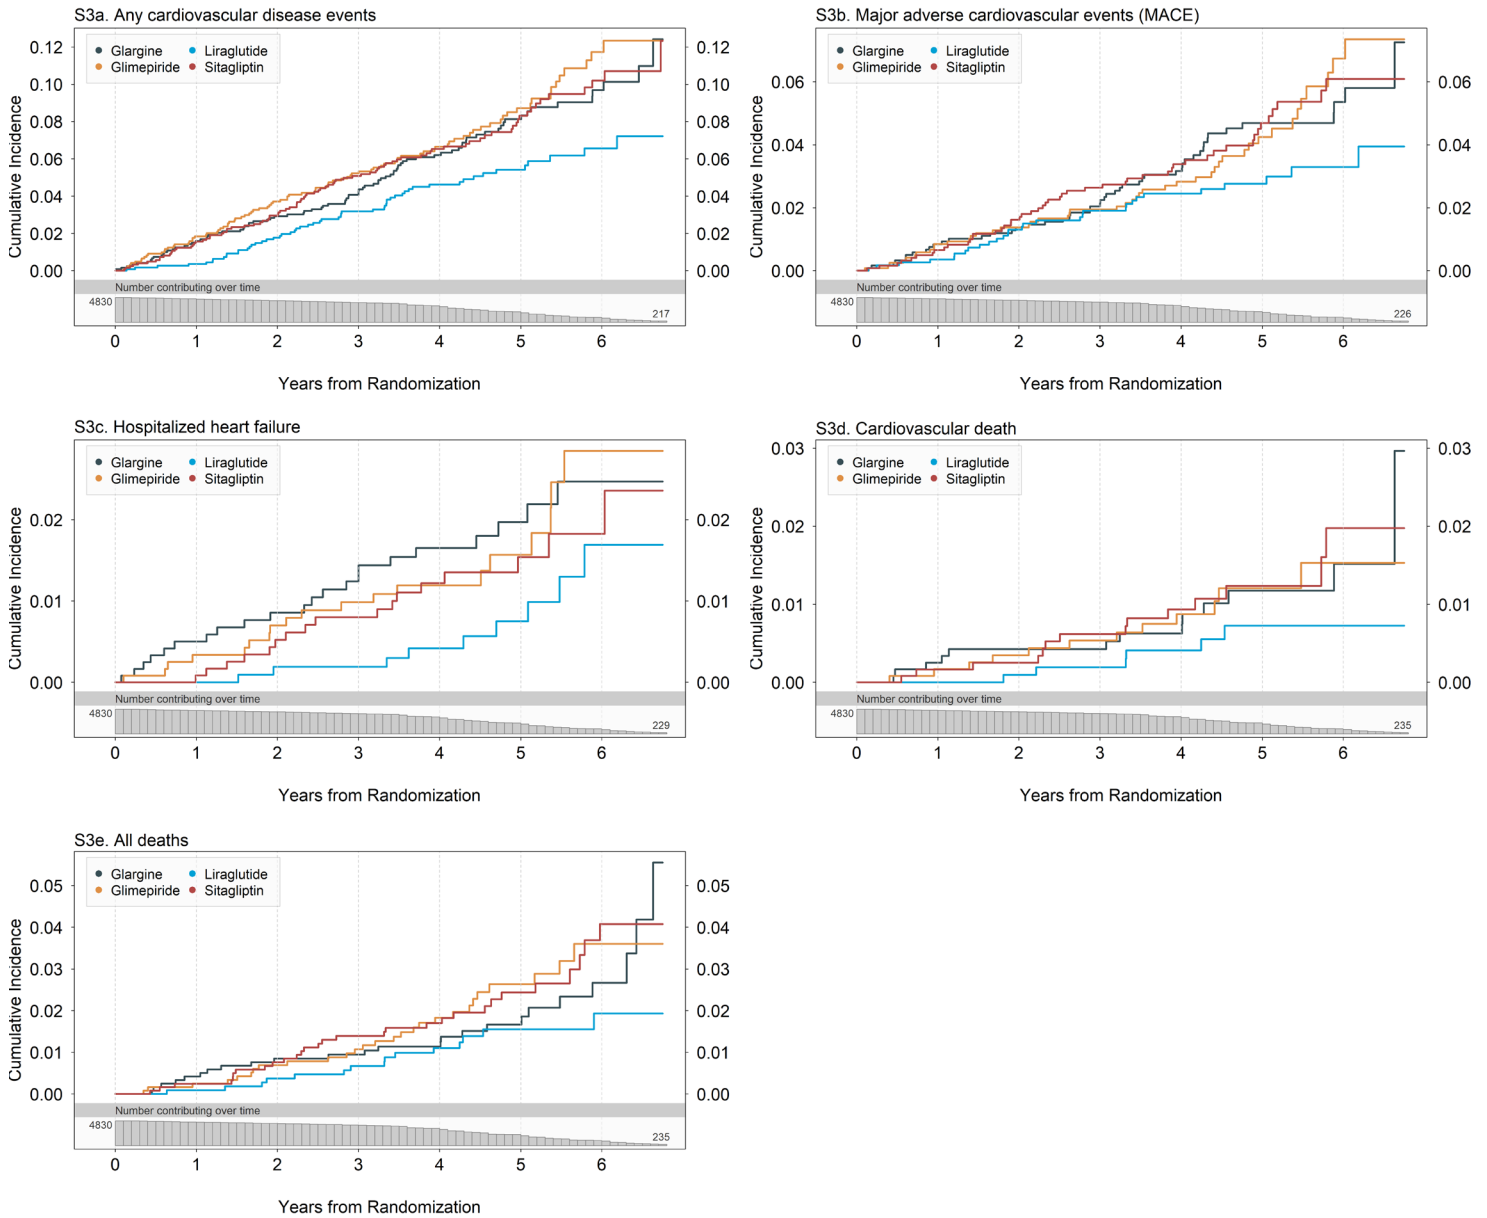

**Table S1. Selected Baseline Characteristics of the Study Cohort.<sup>1</sup>**

| Characteristic                                      | Total        | Glargine*    | Glimepiride  | Liraglutide  | Sitagliptin  |
|-----------------------------------------------------|--------------|--------------|--------------|--------------|--------------|
| N participants                                      | 5,047        | 1,263        | 1,254        | 1,262        | 1,268        |
| <i>Clinical Risk Factors</i>                        |              |              |              |              |              |
| BMI (kg/m <sup>2</sup> )                            | 34.3 ± 6.8   | 34.4 ± 6.8   | 34.3 ± 6.9   | 34.3 ± 6.7   | 34.1 ± 6.8   |
| Weight (kg)                                         | 100.0 ± 22.3 | 100.7 ± 22.3 | 99.7 ± 22.5  | 100.2 ± 22.9 | 99.3 ± 21.7  |
| Diabetes duration (years)                           | 4.2 ± 2.7    | 4.2±2.7      | 4.3±2.8      | 4.2±2.7      | 4.2±2.7      |
| HbA1c (%) <sup>†</sup>                              | 7.5±0.5      | 7.5±0.5      | 7.5±0.5      | 7.5±0.5      | 7.5±0.5      |
| HbA1c <7%                                           | 725(14.4%)   | 184(14.6%)   | 184(14.7%)   | 180(14.3%)   | 177(14.0%)   |
| <i>Lipids</i>                                       |              |              |              |              |              |
| LDL (mg/dL) <sup>†</sup>                            | 90.5±31.7    | 91.6±32.2    | 89.4±31.2    | 91.5±31.8    | 89.6±31.5    |
| HDL (mg/dL) <sup>†</sup>                            | 43.4±10.6    | 43.4±10.5    | 43.6±10.1    | 43.4±11.2    | 43.3±10.5    |
| Triglycerides (mg/dL) <sup>†</sup>                  | 154.0±121.6  | 151.7±114.9  | 153.7±124.8  | 157.0±131.5  | 153.5±114.4  |
| <i>Dyslipidemia</i> <sup>2</sup>                    | 4,852(96.1%) | 1,211(95.9%) | 1,213(96.7%) | 1,208(95.7%) | 1,220(96.2%) |
| <i>Lipid lowering medication use</i>                |              |              |              |              |              |
| Lipid Lowering Use (any)                            | 3,321(65.8%) | 825(65.3%)   | 857(68.3%)   | 795(63.0%)   | 844(66.6%)   |
| Statin Use                                          | 3,210(63.6%) | 803(63.6%)   | 824(65.7%)   | 765(60.6%)   | 818(64.5%)   |
| <i>Hypertension</i>                                 |              |              |              |              |              |
| SBP ≥140 mm/Hg                                      | 1,082(21.4%) | 274(21.7%)   | 264(21.1%)   | 279(22.1%)   | 265(20.9%)   |
| SBP (mm/Hg)                                         | 128.3±14.7   | 128.6±14.8   | 128.2±14.3   | 128.3±15.0   | 128.3±14.9   |
| DBP (mm/Hg)                                         | 77.3±9.9     | 77.5±10.0    | 77.0±9.6     | 77.4±10.0    | 77.3±9.8     |
| Hypertension <sup>3</sup>                           | 3,879(76.9%) | 973(77.0%)   | 963(76.8%)   | 980(77.7%)   | 963(75.9%)   |
| <i>Blood pressure medication use</i>                |              |              |              |              |              |
| BP meds (any)                                       | 3,496(69.3%) | 882(69.8%)   | 865(69.0%)   | 890(70.5%)   | 859(67.7%)   |
| ACEi/ARB                                            | 2,933(58.1%) | 724(57.3%)   | 742(59.2%)   | 738(58.5%)   | 729(57.5%)   |
| BP meds (other than ACEi/ARB)                       | 118(2.3%)    | 30(2.4%)     | 24(1.9%)     | 29(2.3%)     | 35(2.8%)     |
| <i>Baseline renal function</i>                      |              |              |              |              |              |
| UACR (mg/g) <sup>†</sup>                            | 31.5±139.3   | 27.2±87.9    | 36.9±187.8   | 32.9±150.0   | 28.9±111.0   |
| Moderately increased albuminuria<br>(UACR ≥30 mg/g) | 800(15.9%)   | 191(15.1%)   | 201(16.0%)   | 213(16.9%)   | 195(15.4%)   |
| Severely increased albuminuria<br>(UACR ≥300 mg/g)  | 84(1.7%)     | 17(1.3%)     | 27(2.2%)     | 22(1.7%)     | 18(1.4%)     |

*(continued)*

|                                                |           |           |           |           |           |
|------------------------------------------------|-----------|-----------|-----------|-----------|-----------|
| eGFR (mL/min/1.73m <sup>2</sup> ) <sup>†</sup> | 94.9±16.8 | 94.6±16.7 | 95.2±16.9 | 94.2±17.3 | 95.4±16.3 |
| eGFR <60 mL/min/1.73m <sup>2</sup>             | 125(2.5%) | 35(2.8%)  | 28(2.2%)  | 34(2.7%)  | 28(2.2%)  |

*Baseline prevalence of DPN, stroke/MI*

|                        |              |            |            |            |            |
|------------------------|--------------|------------|------------|------------|------------|
| DPN                    | 2,115(41.9%) | 507(40.1%) | 517(41.2%) | 549(43.5%) | 542(42.7%) |
| Stroke/MI <sup>4</sup> | 324(6.4%)    | 80(6.3%)   | 76(6.1%)   | 77(6.1%)   | 91(7.2%)   |

Abbreviations: BMI- body mass index (kg/m<sup>2</sup>), LDL-low density lipoprotein, HDL- high density lipoprotein, SBP- systolic blood pressure, DBP- diastolic blood pressure, ACEi- angiotensin converting enzyme inhibitor, ARB- angiotensin receptor blocker, UACR-urine albumin:creatinine ratio, DPN-diabetic peripheral neuropathy, MI- myocardial infarction.

<sup>1</sup> Statistics are mean ± SD for continuous and N (%) for categorical characteristics

<sup>2</sup> At least one of the following: Taking lipid-lowering medication; history or diagnosis of dyslipidemia or hyperlipidemia; or study-measured LDL ≥100 mg/dL, Triglycerides 150 mg/dL or HDL <40 mg/dL for men, <50 mg/dL for women

<sup>3</sup> At least one of the following: Taking hypertensive medication at screening or baseline visit; history or diagnosis of hypertension at screening or baseline visit; or study-measured

Systolic BP ≥140 mmHg, or Diastolic BP ≥90 mmHg at baseline visit

<sup>4</sup> Occurred >1 year before randomization.

\*Glargine- insulin glargine 100 U/mL

<sup>†</sup>SI unit conversion factors

| Measure      | Standard Units            | SI units                  | Conversion factor<br>(Standard to SI units) |
|--------------|---------------------------|---------------------------|---------------------------------------------|
| eGFR         | mL/min/1.73m <sup>2</sup> | mL/sec/1.73m <sup>2</sup> | Standard x 0.01670 = SI                     |
| UACR         | mg/g                      | mg/mmol                   | Standard x 0.11300 = SI                     |
| Cholesterol  | mg/dL                     | mmol/L                    | Standard x 0.02586 = SI                     |
| Triglyceride | mg/dL                     | mmol/L                    | Standard x 0.01130 = SI                     |
| HDL / LDL    | mg/dL                     | mmol/L                    | Standard x 0.02586 = SI                     |
| HbA1c        | %                         | mmol/mol                  | Standard x 10.93 – 23.5 = SI                |

**Table S2. Comparison with Type 2 Diabetes in US (NHANES 2018).**

Background information on the race, ethnicity, age, sex, and other relevant phenotypic characteristics of the broader population affected by Type 2 diabetes and with similar major eligibility characteristics as for the GRADE cohort (age  $\geq 30$  years, duration  $< 10$  years, HbA1c 6.8-8.5%, and treated with metformin only) from the National Health and Nutrition Examination Study (NHANES), compared with the GRADE cohort.

|                                                      | <b>GRADE</b>                                                                                                                                                                                          | <b>NHANES</b>                                                                                                                                                                                         |
|------------------------------------------------------|-------------------------------------------------------------------------------------------------------------------------------------------------------------------------------------------------------|-------------------------------------------------------------------------------------------------------------------------------------------------------------------------------------------------------|
| Primary study aim                                    | Glycemic durability of second diabetes medication after metformin                                                                                                                                     | Subsample of NHANES participants meeting similar criteria (below)                                                                                                                                     |
| <b>Study Characteristics</b>                         |                                                                                                                                                                                                       |                                                                                                                                                                                                       |
| Key eligibility criteria                             | <ul style="list-style-type: none"> <li>• Age <math>\geq 30</math> years</li> <li>• T2DM <math>&lt; 10</math> years</li> <li>• HbA1c 6.8-8.5% (51-69 mmol/mol) taking metformin monotherapy</li> </ul> | <ul style="list-style-type: none"> <li>• Age <math>\geq 30</math> years</li> <li>• T2DM <math>&lt; 10</math> years</li> <li>• HbA1c 6.8-8.5% (51-69 mmol/mol) taking metformin monotherapy</li> </ul> |
| Randomized intervention                              | Medications representing four classes: Sulfonylurea (glimepiride), DPP-4 inhibitor (sitagliptin), GLP-1 analog (liraglutide), or insulin (glargine)                                                   | n/a                                                                                                                                                                                                   |
| Primary outcome                                      | Time to primary failure, defined as A1c $\geq 7\%$ (53 mmol/mol), confirmed                                                                                                                           | n/a                                                                                                                                                                                                   |
| Years of Study Conduct                               | 2013-2021                                                                                                                                                                                             | 2011-2014                                                                                                                                                                                             |
| <b>Baseline Characteristics of Randomized Cohort</b> |                                                                                                                                                                                                       |                                                                                                                                                                                                       |
| <b>Demographic</b>                                   |                                                                                                                                                                                                       |                                                                                                                                                                                                       |
| N                                                    | 5,047                                                                                                                                                                                                 | 120 (representing population n=2,000,987)                                                                                                                                                             |
| Age $\pm$ SD (years)                                 | 57.2 $\pm$ 10.0                                                                                                                                                                                       | 57.9 $\pm$ 12.0                                                                                                                                                                                       |
| Sex (% male)                                         | 63.6                                                                                                                                                                                                  | 55.9                                                                                                                                                                                                  |
| Race/Ethnicity (%)                                   |                                                                                                                                                                                                       |                                                                                                                                                                                                       |
| Caucasian                                            | 65.8                                                                                                                                                                                                  | 62.1†                                                                                                                                                                                                 |
| African Ancestry                                     | 19.8                                                                                                                                                                                                  | 15.1†                                                                                                                                                                                                 |
| Hispanic                                             | 18.6                                                                                                                                                                                                  | 12.1                                                                                                                                                                                                  |
| Asian                                                | 3.6                                                                                                                                                                                                   | 8.5†                                                                                                                                                                                                  |
| American Indian                                      | 2.8 (AI/AN)                                                                                                                                                                                           | -                                                                                                                                                                                                     |
| Pacific Islander                                     | 0.6                                                                                                                                                                                                   | -                                                                                                                                                                                                     |
| <b>Clinical</b>                                      |                                                                                                                                                                                                       |                                                                                                                                                                                                       |
| Duration of diabetes (years), mean $\pm$ SD          | 4.2 $\pm$ 2.7                                                                                                                                                                                         | 4.2 $\pm$ 2.5                                                                                                                                                                                         |
| Weight $\pm$ SD (kg)                                 | 99.9 $\pm$ 22.3                                                                                                                                                                                       | 95.8 $\pm$ 27.2                                                                                                                                                                                       |
| BMI $\pm$ SD (kg/m <sup>2</sup> )                    | 34.3 $\pm$ 6.8                                                                                                                                                                                        | 33.2 $\pm$ 8.2                                                                                                                                                                                        |

(continued)



|                      |              |              |
|----------------------|--------------|--------------|
| Systolic BP (mmHg)   | 128.3 ± 14.7 | 132.2 ± 18.2 |
| Diastolic BP (mmHg)  | 77.3 ± 9.8   | 74.1 ± 11.4  |
| Current Smoking (%)  | 13.8         | 14.2         |
| History of CVD (%)   | 6.6          | 7.2          |
| Education, years (%) |              |              |
| <13                  | 7.2          |              |
| 13-16                | 49.6         |              |
| ≥ 17                 | 43.2         |              |
| < High school        | 7.2          | 16.8         |
| High school graduate | 20.6         | 24.9         |
| Some college         | 29.0         | 30.8         |
| ≥ College degree     | 43.2         | 27.5         |

|                        |               |               |
|------------------------|---------------|---------------|
| Biochemical            |               |               |
| Glycemia               |               |               |
| Fasting Plasma Glucose |               |               |
| mg/dL                  | 151.5 ± 30.8  | 161.7 ± 35.0  |
| mmol/L                 | 8.41 ± 1.71   | 9.0 ± 1.9     |
| HbA1c                  |               |               |
| %                      | 7.5 ± 0.5     | 7.4 ± 0.6     |
| mmol/mol               | 58 ± 5.5      | 57 ± 6.6      |
| Fasting Insulin        |               |               |
| pmol/L                 | 129.4 ± 95.4  | 122.2 ± 96.4  |
| mU/L                   | 21.6 ± 15.9   | 20.4 ± 16.1   |
| Lipids                 |               |               |
| Total Cholesterol      |               |               |
| mg/dL                  | 163.8 ± 37.8  | 183.2 ± 58.5  |
| mmol/L                 | 4.24 ± 0.98   | 4.74 ± 1.51   |
| LDL cholesterol        |               |               |
| mg/dL                  | 90.5 ± 31.7   | n/a           |
| mmol/L                 | 2.3 ± 0.8     |               |
| HDL cholesterol        |               |               |
| mg/dL                  | 43.4 ± 10.6   | 43.3 ± 10.9   |
| mmol/L                 | 1.1 ± 0.3     | 1.12 ± 0.2    |
| Triglycerides          |               |               |
| mg/dL                  | 154.0 ± 121.6 | 246.5 ± 518.7 |
| mmol/L                 | 1.74 ± 1.37   | 2.8 ± 5.9     |

Table abbreviations: GRADE: Glycemia Reduction Approaches in Diabetes: A Comparative Effectiveness Study; T2DM: type 2 diabetes; FPG: fasting plasma glucose; CVD: cardiovascular disease; LVH: left ventricular hypertrophy; MI: myocardial infarction; CHF: congestive heart failure. † Non-Hispanic

Table (modified) from: Wexler DJ, Krause-Steinrauf H, Crandall JP, Florez HJ, Hox SH, Kuhn A, Sood A, Underkofler C, Aroda VR, GRADE Research Group. Baseline Characteristics of Randomized Participants in the Glycemia Reduction Approaches in Diabetes: A Comparative Effectiveness Study (GRADE). Diabetes Care, 2019;11(43):2098-2107.

**Table S3. Per-protocol Analyses of Microvascular Outcomes.**

Same as Table 1 of the main text but in the per-protocol population consisting of participants who had at least one quarterly visit taking study medication. Only visits at which per-protocol participants were adherent to the protocol were included in the analysis (i.e. visits where participants had not stopped study medication and had not initiated non-study glucose lowering medication(s)).

|                                                     | <b>Glargine<br/>(N=1263)</b> | <b>Glimepiride<br/>(N=1254)</b> | <b>Liraglutide<br/>(N=1262)</b> | <b>Sitagliptin<br/>(N=1268)</b> | <b>Total<br/>(N=5047)</b> |
|-----------------------------------------------------|------------------------------|---------------------------------|---------------------------------|---------------------------------|---------------------------|
| <b>Moderately increased albuminuria<sup>1</sup></b> |                              |                                 |                                 |                                 |                           |
| Number of cases (%)                                 | 134 (13.1%)                  | 134 (13.1%)                     | 109 (11.4%)                     | 111 (10.6%)                     | 488 (12.0%)               |
| Number at risk <sup>5</sup>                         | 1028                         | 1022                            | 954                             | 1049                            | 4053                      |
| Crude Rate (CI)                                     | 3.14 (2.63,3.71)             | 3.27 (2.74,3.87)                | 2.71 (2.23,3.27)                | 2.53 (2.08,3.05)                | 2.91 (2.66,3.18)          |
| Pairwise HR (CI <sup>†</sup> )                      |                              |                                 |                                 |                                 |                           |
| Glargine                                            |                              | 1.00 (0.78,1.28)                | 1.37 (1.04,1.80)                | 1.40 (1.07,1.84)                |                           |
| Glimepiride                                         |                              |                                 | 1.37 (1.04,1.80)                | 1.41 (1.07,1.84)                |                           |
| Liraglutide                                         |                              |                                 |                                 | 1.02 (0.77,1.37)                |                           |
| One vs. others combined HR (CI <sup>†</sup> )       | 1.24 (1.01,1.53)             | 1.25 (1.01,1.54)                | 0.82 (0.65,1.03)                | 0.79 (0.63,1.00)                |                           |
| <b>Severely increased albuminuria<sup>2</sup></b>   |                              |                                 |                                 |                                 |                           |
| Number of cases (%)                                 | 56 (4.7%)                    | 64 (5.4%)                       | 60 (5.3%)                       | 66 (5.4%)                       | 246 (5.2%)                |
| Number at risk <sup>5</sup>                         | 1198                         | 1190                            | 1129                            | 1220                            | 4737                      |
| Crude Rate (CI)                                     | 1.07 (0.81,1.39)             | 1.28 (0.99,1.64)                | 1.23 (0.94,1.59)                | 1.26 (0.98,1.61)                | 1.21 (1.06,1.37)          |
| Pairwise HR (CI <sup>†</sup> )                      |                              |                                 |                                 |                                 |                           |
| Glargine                                            |                              | 0.80 (0.54,1.18)                | 0.86 (0.57,1.28)                | 0.75 (0.51,1.10)                |                           |
| Glimepiride                                         |                              |                                 | 1.07 (0.73,1.57)                | 0.94 (0.65,1.36)                |                           |
| Liraglutide                                         |                              |                                 |                                 | 0.88 (0.60,1.28)                |                           |
| One vs. others combined HR (CI <sup>†</sup> )       | 0.80 (0.58,1.11)             | 1.08 (0.80,1.47)                | 0.99 (0.72,1.35)                | 1.17 (0.87,1.58)                |                           |
| <b>eGFR<sup>3</sup> &lt;60 ml/min/m<sup>2</sup></b> |                              |                                 |                                 |                                 |                           |
| Number of cases (%)                                 | 143 (12.5%)                  | 150 (12.9%)                     | 159 (14.5%)                     | 142 (11.9%)                     | 594 (12.9%)               |
| Number at risk <sup>5</sup>                         | 1149                         | 1174                            | 1098                            | 1190                            | 4611                      |
| Crude Rate (CI)                                     | 3.07 (2.59,3.62)             | 3.30 (2.79,3.87)                | 3.65 (3.10,4.26)                | 2.98 (2.51,3.51)                | 3.24 (2.99,3.51)          |
| Pairwise HR (CI <sup>†</sup> )                      |                              |                                 |                                 |                                 |                           |
| Glargine                                            |                              | 0.98 (0.77,1.26)                | 0.89 (0.70,1.14)                | 1.03 (0.80,1.32)                |                           |
| Glimepiride                                         |                              |                                 | 0.91 (0.71,1.16)                | 1.05 (0.82,1.35)                |                           |
| Liraglutide                                         |                              |                                 |                                 | 1.15 (0.90,1.47)                |                           |
| One vs. others combined HR (CI <sup>†</sup> )       | 0.97 (0.79,1.18)             | 0.99 (0.81,1.21)                | 1.12 (0.92,1.37)                | 0.93 (0.76,1.14)                |                           |

(continued)

| <b>Diabetic peripheral neuropathy<sup>4</sup></b> |                  |                  |                   |                  |                  |
|---------------------------------------------------|------------------|------------------|-------------------|------------------|------------------|
| Number of cases (%)                               | 362 (49.9%)      | 379 (53.2%)      | 322 (49.4%)       | 368 (52.1%)      | 1431 (51.2%)     |
| Number at risk <sup>5</sup>                       | 726              | 712              | 652               | 707              | 2797             |
| Crude Rate (CI)                                   | 16.1 (14.5,17.8) | 18.6 (16.8,20.6) | 16.47 (14.7,18.4) | 17.6 (15.9,19.5) | 17.2 (16.3,18.1) |
| Pairwise HR (CI <sup>†</sup> )                    |                  |                  |                   |                  |                  |
| Glargine                                          | 0.86 (0.74,0.99) | 0.96 (0.83,1.12) | 0.90 (0.78,1.04)  | 0.86 (0.74,0.99) |                  |
| Glimepiride                                       |                  | 1.12 (0.97,1.31) | 1.05 (0.91,1.22)  |                  |                  |
| Liraglutide                                       |                  |                  | 0.94 (0.81,1.09)  |                  |                  |
| One vs. others combined HR (CI <sup>†</sup> )     | 0.91 (0.80,1.02) | 1.11 (0.99,1.26) | 0.95 (0.84,1.08)  | 1.04 (0.92,1.17) |                  |

<sup>1</sup>Moderately increased albuminuria -urine albumin creatinine ratio  $\geq 30$  mg/gm, confirmed.

<sup>2</sup>Severely increased albuminuria -urine albumin creatinine ratio  $\geq 300$  mg/gm

<sup>3</sup>eGFR- estimated glomerular filtration rate. Participants with incident end-stage kidney disease (dialysis, transplant or renal death) that developed during the study were included in both categorical albuminuria outcomes.

<sup>4</sup>Assessed using the Michigan Neuropathy Screening Instrument

<sup>5</sup>Excludes prevalent cases at baseline

<sup>†</sup>Confidence intervals are unadjusted for multiple comparisons

Glargine = insulin glargine 100 U/mL

60 ml/min/m<sup>2</sup> = 1.002 ml/sec/m<sup>2</sup> (eGFR threshold for defining impaired renal function)

**Table S4. Per-protocol Analyses of Cardiovascular Outcomes.**

Same as Table 3 of the main text but in the per-protocol population consisting of participants who had at least one quarterly visit taking study medication. Only visits at which per-protocol participants were adherent to the protocol were included in the analysis (i.e. visits where participants had not stopped study medication and had not initiated non-study glucose lowering medication(s)).

|                                               | <b>Glargine<br/>(N=1263)</b> | <b>Glimepiride<br/>(N=1254)</b> | <b>Liraglutide<br/>(N=1262)</b> | <b>Sitagliptin<br/>(N=1268)</b> | <b>Total<br/>(N=5047)</b> |
|-----------------------------------------------|------------------------------|---------------------------------|---------------------------------|---------------------------------|---------------------------|
| <b>Any CVD<sup>1</sup></b>                    |                              |                                 |                                 |                                 |                           |
| Number of cases (%)                           | 105 (8.6%)                   | 114 (9.4%)                      | 75 (6.5%)                       | 118 (9.5%)                      | 412 (8.6%)                |
| Number at risk <sup>4</sup>                   | 1215                         | 1217                            | 1150                            | 1238                            | 4820                      |
| Crude Rate (CI)                               | 1.99 (1.63,2.41)             | 2.26 (1.87,2.72)                | 1.51 (1.18,1.89)                | 2.23 (1.85,2.67)                | 2.00 (1.81,2.21)          |
| Pairwise HR (CI <sup>†</sup> )                |                              |                                 |                                 |                                 |                           |
| Glargine                                      |                              | 0.90 (0.67,1.20)                | 1.50 (1.07,2.10)                | 0.97 (0.72,1.30)                |                           |
| Glimepiride                                   |                              |                                 | 1.67 (1.20,2.32)                | 1.08 (0.81,1.44)                |                           |
| Liraglutide                                   |                              |                                 |                                 | 0.65 (0.46,0.90)                |                           |
| One vs. others combined HR (CI <sup>†</sup> ) | 1.09 (0.86,1.40)             | 1.26 (0.99,1.60)                | 0.64 (0.48,0.85)                | 1.14 (0.90,1.45)                |                           |
| <b>MACE<sup>2</sup></b>                       |                              |                                 |                                 |                                 |                           |
| Number of cases (%)                           | 60 (4.9%)                    | 58 (4.8%)                       | 43 (3.7%)                       | 67 (5.4%)                       | 228 (4.7%)                |
| Number at risk <sup>4</sup>                   | 1215                         | 1217                            | 1150                            | 1238                            | 4820                      |
| Crude Rate (CI)                               | 1.12 (0.85,1.44)             | 1.13 (0.86,1.46)                | 0.86 (0.62,1.15)                | 1.25 (0.97,1.59)                | 1.09 (0.95,1.24)          |
| Pairwise HR (CI <sup>†</sup> )                |                              |                                 |                                 |                                 |                           |
| Glargine                                      |                              | 1.01 (0.67,1.51)                | 1.53 (0.97,2.41)                | 0.98 (0.66,1.45)                |                           |
| Glimepiride                                   |                              |                                 | 1.52 (0.96,2.41)                | 0.97 (0.65,1.44)                |                           |
| Liraglutide                                   |                              |                                 |                                 | 0.64 (0.41,1.00)                |                           |
| One vs. others combined HR (CI <sup>†</sup> ) | 1.15 (0.82,1.60)             | 1.13 (0.81,1.59)                | 0.65 (0.44,0.96)                | 1.18 (0.85,1.65)                |                           |
| <b>Heart Failure<sup>3</sup></b>              |                              |                                 |                                 |                                 |                           |
| Number of cases (%)                           | 23 (1.9%)                    | 30 (2.5%)                       | 14 (1.2%)                       | 30 (2.4%)                       | 97 (2.0%)                 |
| Number at risk <sup>4</sup>                   | 1215                         | 1217                            | 1150                            | 1238                            | 4820                      |
| Crude Rate (CI)                               | 0.43 (0.27,0.64)             | 0.58 (0.39,0.83)                | 0.28 (0.15,0.46)                | 0.55 (0.37,0.79)                | 0.46 (0.37,0.56)          |
| Pairwise HR (CI <sup>†</sup> )                |                              |                                 |                                 |                                 |                           |
| Glargine                                      |                              | 1.10 (0.60,2.04)                | 2.30 (1.06,5.00)                | 1.30 (0.69,2.44)                |                           |
| Glimepiride                                   |                              |                                 | 2.09 (0.95,4.59)                | 1.17 (0.61,2.26)                |                           |
| Liraglutide                                   |                              |                                 |                                 | 0.56 (0.25,1.26)                |                           |
| One vs. others combined HR (CI <sup>†</sup> ) | 1.49 (0.88,2.51)             | 1.30 (0.76,2.24)                | 0.49 (0.24,0.99)                | 1.05 (0.60,1.85)                |                           |

(continued)

| <b>Cardiovascular death</b>                   |                  |                  |                  |                  |                  |
|-----------------------------------------------|------------------|------------------|------------------|------------------|------------------|
| Number of cases (%)                           | 19 (1.6%)        | 16 (1.3%)        | 8 (0.7%)         | 21 (1.7%)        | 64 (1.3%)        |
| Number at risk <sup>4</sup>                   | 1215             | 1217             | 1150             | 1238             | 4820             |
| Crude Rate (CI)                               | 0.35 (0.21,0.55) | 0.31 (0.18,0.50) | 0.16 (0.07,0.31) | 0.39 (0.24,0.59) | 0.30 (0.23,0.39) |
| Pairwise HR (CI <sup>†</sup> )                |                  |                  |                  |                  |                  |
| Glargine                                      |                  | 1.02 (0.47,2.23) | 2.02 (0.77,5.30) | 0.92 (0.43,1.96) |                  |
| Glimepiride                                   |                  |                  | 1.98 (0.74,5.27) | 0.90 (0.42,1.95) |                  |
| Liraglutide                                   |                  |                  |                  | 0.46 (0.18,1.19) |                  |
| One vs. others combined HR (CI <sup>†</sup> ) | 1.24 (0.64,2.38) | 1.21 (0.62,2.37) | 0.49 (0.21,1.15) | 1.38 (0.73,2.63) |                  |
| <b>All Deaths</b>                             |                  |                  |                  |                  |                  |
| Number of cases (%)                           | 39 (3.2%)        | 42 (3.5%)        | 23 (2.0%)        | 40 (3.2%)        | 144 (3.0%)       |
| Number at risk <sup>4</sup>                   | 1215             | 1217             | 1150             | 1238             | 4820             |
| Crude Rate (CI)                               | 0.70 (0.50,0.96) | 0.79 (0.57,1.07) | 0.45 (0.28,0.67) | 0.72 (0.52,0.98) | 0.67 (0.56,0.79) |
| Pairwise HR (CI <sup>†</sup> )                |                  |                  |                  |                  |                  |
| Glargine                                      |                  | 0.86 (0.50,1.48) | 1.55 (0.82,2.94) | 0.85 (0.50,1.45) |                  |
| Glimepiride                                   |                  |                  | 1.80 (0.96,3.39) | 0.99 (0.59,1.67) |                  |
| Liraglutide                                   |                  |                  |                  | 0.55 (0.29,1.03) |                  |
| One vs. others combined HR (CI <sup>†</sup> ) | 1.04 (0.66,1.65) | 1.27 (0.81,2.00) | 0.58 (0.34,1.01) | 1.29 (0.83,2.00) |                  |

<sup>1</sup>Any CVD (cardiovascular disease)- first of any MACE, unstable angina requiring hospitalization or revascularization, heart failure requiring hospitalization, or any revascularization event.

<sup>2</sup>MACE- major adverse cardiovascular events including CVD death, non-fatal myocardial infarction or non-fatal stroke.

<sup>3</sup>Hospitalized heart failure.

<sup>4</sup>Excludes prevalent cases at baseline

<sup>†</sup>Confidence intervals are unadjusted for multiple comparisons

Glargine = insulin glargine 100 U/mL

**Table S5. Subgroup Analyses of Outcomes**

**Table S5.A:** Sub-group analyses of microvascular outcomes stratified according to seven pre-specified baseline factors. Since the analysis did not correct for multiple subgroup factors, per the Journal statistical guidelines, only a descriptive presentation is provided that includes the number of outcome cases (*Ne*) and the crude rate (hazard) per 100 patient years of follow-up with uncorrected 95% confidence limits.

| Subgroups   | Treatment   | Moderately increased albuminuria<br>( $\geq 30$ mg/g) |                 |                      | Severely increased albuminuria<br>( $\geq 300$ mg/g) |                 |                      | eGFR < 60 ml/min/m2 |                 |                      |
|-------------|-------------|-------------------------------------------------------|-----------------|----------------------|------------------------------------------------------|-----------------|----------------------|---------------------|-----------------|----------------------|
|             |             | N <sup>1</sup>                                        | Ne <sup>2</sup> | Rate/100yrs (95% CI) | N <sup>1</sup>                                       | Ne <sup>2</sup> | Rate/100yrs (95% CI) | N <sup>1</sup>      | Ne <sup>2</sup> | Rate/100yrs (95% CI) |
| <b>Sex</b>  |             |                                                       |                 |                      |                                                      |                 |                      |                     |                 |                      |
| Male        | Glargine    | 676                                                   | 92              | 2.99 (2.41, 3.67)    | 796                                                  | 45              | 1.17 (0.86, 1.57)    | 752                 | 97              | 2.98 (2.42, 3.64)    |
|             | Glimepiride | 640                                                   | 99              | 3.40 (2.76, 4.14)    | 762                                                  | 47              | 1.28 (0.94, 1.70)    | 751                 | 93              | 2.84 (2.29, 3.48)    |
|             | Liraglutide | 667                                                   | 83              | 2.71 (2.16, 3.36)    | 799                                                  | 53              | 1.40 (1.05, 1.83)    | 780                 | 112             | 3.34 (2.75, 4.02)    |
|             | Sitagliptin | 662                                                   | 76              | 2.49 (1.97, 3.12)    | 780                                                  | 46              | 1.24 (0.91, 1.65)    | 757                 | 95              | 2.93 (2.37, 3.58)    |
| Female      | Glargine    | 390                                                   | 44              | 2.37 (1.73, 3.19)    | 444                                                  | 14              | 0.63 (0.34, 1.05)    | 422                 | 47              | 2.45 (1.80, 3.25)    |
|             | Glimepiride | 406                                                   | 36              | 1.86 (1.30, 2.57)    | 458                                                  | 17              | 0.75 (0.44, 1.20)    | 447                 | 58              | 2.94 (2.23, 3.80)    |
|             | Liraglutide | 373                                                   | 38              | 2.06 (1.46, 2.83)    | 430                                                  | 17              | 0.77 (0.45, 1.24)    | 404                 | 58              | 3.10 (2.36, 4.01)    |
|             | Sitagliptin | 408                                                   | 39              | 1.99 (1.41, 2.72)    | 466                                                  | 20              | 0.86 (0.53, 1.33)    | 451                 | 50              | 2.42 (1.80, 3.20)    |
| <b>Race</b> |             |                                                       |                 |                      |                                                      |                 |                      |                     |                 |                      |
| White       | Glargine    | 714                                                   | 91              | 2.77 (2.23, 3.40)    | 825                                                  | 41              | 1.03 (0.74, 1.39)    | 782                 | 104             | 3.02 (2.47, 3.66)    |
|             | Glimepiride | 673                                                   | 89              | 2.89 (2.32, 3.56)    | 789                                                  | 40              | 1.05 (0.75, 1.43)    | 772                 | 114             | 3.48 (2.87, 4.18)    |
|             | Liraglutide | 678                                                   | 73              | 2.29 (1.80, 2.88)    | 797                                                  | 42              | 1.09 (0.78, 1.47)    | 762                 | 121             | 3.65 (3.03, 4.36)    |
|             | Sitagliptin | 712                                                   | 78              | 2.36 (1.87, 2.95)    | 841                                                  | 43              | 1.07 (0.77, 1.44)    | 815                 | 104             | 2.97 (2.42, 3.60)    |
| Black       | Glargine    | 214                                                   | 23              | 2.28 (1.45, 3.43)    | 246                                                  | 11              | 0.90 (0.45, 1.61)    | 232                 | 22              | 2.18 (1.36, 3.30)    |
|             | Glimepiride | 229                                                   | 31              | 2.88 (1.95, 4.08)    | 262                                                  | 13              | 1.00 (0.53, 1.71)    | 257                 | 27              | 2.30 (1.51, 3.34)    |
|             | Liraglutide | 209                                                   | 20              | 1.97 (1.20, 3.04)    | 244                                                  | 17              | 1.40 (0.82, 2.25)    | 239                 | 19              | 1.75 (1.05, 2.73)    |
|             | Sitagliptin | 197                                                   | 22              | 2.37 (1.48, 3.59)    | 221                                                  | 12              | 1.11 (0.57, 1.94)    | 211                 | 24              | 2.53 (1.62, 3.77)    |
| All Others  | Glargine    | 138                                                   | 22              | 3.47 (2.17, 5.25)    | 169                                                  | 7               | 0.83 (0.33, 1.72)    | 160                 | 18              | 2.48 (1.47, 3.92)    |
|             | Glimepiride | 144                                                   | 15              | 2.15 (1.20, 3.54)    | 169                                                  | 11              | 1.32 (0.66, 2.37)    | 169                 | 10              | 1.27 (0.61, 2.33)    |
|             | Liraglutide | 153                                                   | 28              | 3.98 (2.64, 5.75)    | 188                                                  | 11              | 1.20 (0.60, 2.15)    | 183                 | 30              | 3.66 (2.47, 5.23)    |
|             | Sitagliptin | 161                                                   | 15              | 1.92 (1.08, 3.17)    | 184                                                  | 11              | 1.20 (0.60, 2.14)    | 182                 | 17              | 1.99 (1.16, 3.19)    |

(continued)

| Subgroups          | Treatment   | Moderately increased albuminuria<br>( $\geq 30$ mg/g) |                 |                      | Severely increased albuminuria<br>( $\geq 300$ mg/g) |                 |                      | eGFR < 60 ml/min/m <sup>2</sup> |                 |                      |
|--------------------|-------------|-------------------------------------------------------|-----------------|----------------------|------------------------------------------------------|-----------------|----------------------|---------------------------------|-----------------|----------------------|
|                    |             | N <sup>1</sup>                                        | Ne <sup>2</sup> | Rate/100yrs (95% CI) | N <sup>1</sup>                                       | Ne <sup>2</sup> | Rate/100yrs (95% CI) | N <sup>1</sup>                  | Ne <sup>2</sup> | Rate/100yrs (95% CI) |
| <b>Ethnicity</b>   |             |                                                       |                 |                      |                                                      |                 |                      |                                 |                 |                      |
| Hispanic           | Glargine    | 177                                                   | 20              | 2.50 (1.52, 3.85)    | 213                                                  | 13              | 1.28 (0.68, 2.18)    | 203                             | 12              | 1.31 (0.68, 2.28)    |
|                    | Glimepiride | 196                                                   | 17              | 1.84 (1.07, 2.94)    | 225                                                  | 10              | 0.92 (0.44, 1.69)    | 226                             | 14              | 1.41 (0.77, 2.36)    |
|                    | Liraglutide | 183                                                   | 24              | 2.77 (1.78, 4.12)    | 225                                                  | 18              | 1.67 (0.99, 2.63)    | 219                             | 22              | 2.28 (1.43, 3.45)    |
|                    | Sitagliptin | 200                                                   | 24              | 2.61 (1.67, 3.88)    | 235                                                  | 12              | 1.06 (0.55, 1.84)    | 232                             | 17              | 1.65 (0.96, 2.65)    |
| Non-Hisp           | Glargine    | 878                                                   | 116             | 2.84 (2.35, 3.41)    | 1016                                                 | 46              | 0.92 (0.67, 1.23)    | 963                             | 131             | 3.10 (2.59, 3.68)    |
|                    | Glimepiride | 839                                                   | 116             | 2.99 (2.47, 3.58)    | 981                                                  | 52              | 1.08 (0.81, 1.42)    | 959                             | 135             | 3.22 (2.70, 3.81)    |
|                    | Liraglutide | 852                                                   | 97              | 2.41 (1.96, 2.94)    | 999                                                  | 52              | 1.06 (0.80, 1.40)    | 961                             | 147             | 3.47 (2.93, 4.08)    |
|                    | Sitagliptin | 861                                                   | 89              | 2.20 (1.77, 2.71)    | 1001                                                 | 53              | 1.09 (0.82, 1.43)    | 968                             | 126             | 2.97 (2.47, 3.54)    |
| <b>Age (years)</b> |             |                                                       |                 |                      |                                                      |                 |                      |                                 |                 |                      |
| <45                | Glargine    | 125                                                   | 12              | 2.05 (1.06, 3.58)    | 149                                                  | 5               | 0.69 (0.22, 1.62)    | 141                             | 2               | 0.30 (0.04, 1.10)    |
|                    | Glimepiride | 140                                                   | 15              | 2.31 (1.29, 3.80)    | 157                                                  | 8               | 1.05 (0.45, 2.06)    | 159                             | 1               | 0.14 (0.00, 0.78)    |
|                    | Liraglutide | 128                                                   | 17              | 2.71 (1.58, 4.34)    | 149                                                  | 5               | 0.66 (0.22, 1.55)    | 150                             | 6               | 0.86 (0.32, 1.87)    |
|                    | Sitagliptin | 127                                                   | 16              | 2.67 (1.52, 4.33)    | 148                                                  | 8               | 1.11 (0.48, 2.18)    | 145                             | 3               | 0.44 (0.09, 1.27)    |
| 45-59              | Glargine    | 512                                                   | 58              | 2.43 (1.84, 3.14)    | 596                                                  | 25              | 0.85 (0.55, 1.26)    | 573                             | 43              | 1.65 (1.20, 2.22)    |
|                    | Glimepiride | 468                                                   | 43              | 1.93 (1.40, 2.60)    | 538                                                  | 21              | 0.80 (0.49, 1.22)    | 541                             | 42              | 1.71 (1.23, 2.31)    |
|                    | Liraglutide | 471                                                   | 48              | 2.12 (1.56, 2.81)    | 554                                                  | 27              | 0.99 (0.65, 1.43)    | 538                             | 53              | 2.16 (1.62, 2.83)    |
|                    | Sitagliptin | 521                                                   | 36              | 1.42 (0.99, 1.97)    | 597                                                  | 24              | 0.81 (0.52, 1.21)    | 582                             | 32              | 1.19 (0.82, 1.69)    |
| 60+                | Glargine    | 429                                                   | 66              | 3.38 (2.61, 4.30)    | 495                                                  | 29              | 1.20 (0.81, 1.73)    | 460                             | 99              | 5.17 (4.20, 6.29)    |
|                    | Glimepiride | 438                                                   | 77              | 3.90 (3.08, 4.88)    | 525                                                  | 35              | 1.38 (0.96, 1.92)    | 498                             | 108             | 5.21 (4.28, 6.29)    |
|                    | Liraglutide | 441                                                   | 56              | 2.77 (2.10, 3.60)    | 526                                                  | 38              | 1.52 (1.08, 2.09)    | 496                             | 111             | 5.36 (4.41, 6.45)    |
|                    | Sitagliptin | 422                                                   | 63              | 3.36 (2.59, 4.30)    | 501                                                  | 34              | 1.44 (1.00, 2.02)    | 481                             | 110             | 5.68 (4.67, 6.85)    |

(continued)

| Subgroups                         | Treatment   | Moderately increased albuminuria<br>( $\geq 30$ mg/g) |                 |                      | Severely increased albuminuria<br>( $\geq 300$ mg/g) |                 |                      | eGFR < 60 ml/min/m <sup>2</sup> |                 |                      |                   |
|-----------------------------------|-------------|-------------------------------------------------------|-----------------|----------------------|------------------------------------------------------|-----------------|----------------------|---------------------------------|-----------------|----------------------|-------------------|
|                                   |             | N <sup>1</sup>                                        | Ne <sup>2</sup> | Rate/100yrs (95% CI) | N <sup>1</sup>                                       | Ne <sup>2</sup> | Rate/100yrs (95% CI) | N <sup>1</sup>                  | Ne <sup>2</sup> | Rate/100yrs (95% CI) |                   |
| <b>BMI<br/>(kg/m<sup>2</sup>)</b> |             |                                                       |                 |                      |                                                      |                 |                      |                                 |                 |                      |                   |
|                                   | 18.2-30.7   | Glargine                                              | 354             | 44                   | 2.65 (1.93, 3.56)                                    | 403             | 18                   | 0.90 (0.53, 1.43)               | 378             | 55                   | 3.36 (2.53, 4.37) |
|                                   |             | Glimepiride                                           | 357             | 44                   | 2.65 (1.93, 3.56)                                    | 417             | 24                   | 1.18 (0.76, 1.75)               | 409             | 44                   | 2.44 (1.77, 3.28) |
|                                   |             | Liraglutide                                           | 344             | 51                   | 3.22 (2.40, 4.24)                                    | 391             | 23                   | 1.21 (0.77, 1.82)               | 372             | 51                   | 3.09 (2.30, 4.06) |
|                                   | Sitagliptin | 399                                                   | 40              | 2.17 (1.55, 2.96)    | 440                                                  | 12              | 0.56 (0.29, 0.99)    | 426                             | 54              | 2.94 (2.21, 3.83)    |                   |
| 30.7-36.3                         | Glargine    | 362                                                   | 43              | 2.55 (1.85, 3.44)    | 418                                                  | 14              | 0.68 (0.37, 1.15)    | 396                             | 50              | 2.86 (2.12, 3.77)    |                   |
|                                   | Glimepiride | 349                                                   | 44              | 2.67 (1.94, 3.59)    | 394                                                  | 18              | 0.92 (0.55, 1.46)    | 386                             | 53              | 3.13 (2.34, 4.09)    |                   |
|                                   | Liraglutide | 369                                                   | 35              | 1.98 (1.38, 2.76)    | 433                                                  | 20              | 0.93 (0.57, 1.44)    | 418                             | 56              | 2.99 (2.26, 3.88)    |                   |
|                                   | Sitagliptin | 338                                                   | 30              | 1.87 (1.26, 2.67)    | 398                                                  | 24              | 1.24 (0.79, 1.84)    | 385                             | 45              | 2.66 (1.94, 3.56)    |                   |
| 36.3-74.3                         | Glargine    | 350                                                   | 49              | 3.09 (2.29, 4.09)    | 417                                                  | 26              | 1.29 (0.84, 1.89)    | 399                             | 38              | 2.13 (1.51, 2.93)    |                   |
|                                   | Glimepiride | 337                                                   | 47              | 3.07 (2.25, 4.08)    | 406                                                  | 22              | 1.14 (0.71, 1.72)    | 400                             | 54              | 3.11 (2.34, 4.06)    |                   |
|                                   | Liraglutide | 326                                                   | 35              | 2.25 (1.57, 3.13)    | 403                                                  | 26              | 1.34 (0.88, 1.97)    | 393                             | 63              | 3.72 (2.86, 4.76)    |                   |
|                                   | Sitagliptin | 331                                                   | 45              | 2.89 (2.11, 3.87)    | 406                                                  | 30              | 1.53 (1.03, 2.18)    | 395                             | 46              | 2.61 (1.91, 3.48)    |                   |
| <b>HbA1c<br/>(%)</b>              |             |                                                       |                 |                      |                                                      |                 |                      |                                 |                 |                      |                   |
|                                   | 6.8-7.2     | Glargine                                              | 395             | 41                   | 2.20 (1.58, 2.98)                                    | 467             | 17                   | 0.74 (0.43, 1.18)               | 435             | 59                   | 3.05 (2.32, 3.93) |
|                                   |             | Glimepiride                                           | 410             | 41                   | 2.08 (1.49, 2.82)                                    | 484             | 32                   | 1.35 (0.92, 1.91)               | 474             | 67                   | 3.21 (2.49, 4.08) |
|                                   |             | Liraglutide                                           | 418             | 43                   | 2.18 (1.58, 2.94)                                    | 487             | 30                   | 1.28 (0.86, 1.82)               | 464             | 67                   | 3.32 (2.57, 4.22) |
|                                   | Sitagliptin | 403                                                   | 44              | 2.33 (1.69, 3.13)    | 459                                                  | 19              | 0.85 (0.51, 1.33)    | 444                             | 58              | 2.98 (2.26, 3.85)    |                   |
| 7.2-7.7                           | Glargine    | 331                                                   | 40              | 2.61 (1.86, 3.55)    | 385                                                  | 26              | 1.38 (0.90, 2.03)    | 367                             | 50              | 3.11 (2.31, 4.11)    |                   |
|                                   | Glimepiride | 334                                                   | 47              | 3.09 (2.27, 4.11)    | 388                                                  | 18              | 0.95 (0.57, 1.51)    | 380                             | 48              | 2.89 (2.13, 3.84)    |                   |
|                                   | Liraglutide | 312                                                   | 43              | 2.89 (2.09, 3.89)    | 364                                                  | 19              | 1.05 (0.63, 1.64)    | 352                             | 53              | 3.38 (2.53, 4.42)    |                   |
|                                   | Sitagliptin | 349                                                   | 34              | 2.04 (1.41, 2.85)    | 406                                                  | 19              | 0.95 (0.57, 1.49)    | 390                             | 36              | 2.07 (1.45, 2.86)    |                   |
| 7.7-8.5                           | Glargine    | 340                                                   | 55              | 3.60 (2.71, 4.68)    | 388                                                  | 16              | 0.85 (0.49, 1.39)    | 372                             | 35              | 2.14 (1.49, 2.98)    |                   |
|                                   | Glimepiride | 302                                                   | 47              | 3.47 (2.55, 4.61)    | 348                                                  | 14              | 0.83 (0.45, 1.40)    | 344                             | 36              | 2.40 (1.68, 3.32)    |                   |
|                                   | Liraglutide | 310                                                   | 35              | 2.42 (1.68, 3.36)    | 378                                                  | 21              | 1.15 (0.71, 1.76)    | 368                             | 50              | 3.06 (2.27, 4.04)    |                   |
|                                   | Sitagliptin | 318                                                   | 37              | 2.54 (1.79, 3.51)    | 381                                                  | 28              | 1.55 (1.03, 2.24)    | 374                             | 51              | 3.16 (2.35, 4.15)    |                   |

(continued)



| Subgroups                     | Treatment   | Moderately increased albuminuria<br>(≥ 30 mg/g) |                   |                      | Severely increased albuminuria<br>(≥ 300 mg/g) |                   |                      | eGFR < 60 ml/min/m2 |                   |                      |
|-------------------------------|-------------|-------------------------------------------------|-------------------|----------------------|------------------------------------------------|-------------------|----------------------|---------------------|-------------------|----------------------|
|                               |             | N <sup>1</sup>                                  | Ne <sup>2</sup>   | Rate/100yrs (95% CI) | N <sup>1</sup>                                 | Ne <sup>2</sup>   | Rate/100yrs (95% CI) | N <sup>1</sup>      | Ne <sup>2</sup>   | Rate/100yrs (95% CI) |
| Diabetes<br>Duration<br>(yrs) | 0-2.5       |                                                 |                   |                      |                                                |                   |                      |                     |                   |                      |
|                               | Glargine    | 352                                             | 42                | 2.64 (1.90, 3.56)    | 406                                            | 13                | 0.66 (0.35, 1.14)    | 378                 | 32                | 1.92 (1.32, 2.72)    |
|                               | Glimepiride | 353                                             | 40                | 2.45 (1.75, 3.34)    | 403                                            | 14                | 0.71 (0.39, 1.20)    | 397                 | 45                | 2.57 (1.88, 3.44)    |
|                               | Liraglutide | 353                                             | 45                | 2.77 (2.02, 3.70)    | 423                                            | 21                | 1.04 (0.64, 1.59)    | 413                 | 65                | 3.70 (2.86, 4.72)    |
|                               | Sitagliptin | 365                                             | 46                | 2.72 (1.99, 3.63)    | 417                                            | 18                | 0.89 (0.53, 1.41)    | 409                 | 34                | 1.87 (1.30, 2.62)    |
|                               | 2.5-5.4     |                                                 |                   |                      |                                                |                   |                      |                     |                   |                      |
|                               | Glargine    | 384                                             | 46                | 2.49 (1.82, 3.32)    | 450                                            | 27                | 1.18 (0.78, 1.72)    | 431                 | 52                | 2.66 (1.99, 3.49)    |
|                               | Glimepiride | 320                                             | 46                | 3.00 (2.19, 4.00)    | 382                                            | 20                | 1.04 (0.63, 1.60)    | 376                 | 48                | 2.83 (2.09, 3.75)    |
|                               | Liraglutide | 329                                             | 30                | 1.86 (1.25, 2.65)    | 384                                            | 19                | 0.99 (0.59, 1.54)    | 369                 | 37                | 2.19 (1.54, 3.02)    |
|                               | Sitagliptin | 361                                             | 34                | 1.97 (1.37, 2.76)    | 423                                            | 21                | 1.00 (0.62, 1.53)    | 410                 | 54                | 2.94 (2.21, 3.84)    |
|                               | 5.4-11.2    |                                                 |                   |                      |                                                |                   |                      |                     |                   |                      |
|                               | Glargine    | 330                                             | 48                | 3.23 (2.38, 4.29)    | 384                                            | 19                | 1.04 (0.63, 1.62)    | 365                 | 60                | 3.85 (2.94, 4.96)    |
|                               | Glimepiride | 373                                             | 49                | 2.91 (2.15, 3.84)    | 435                                            | 30                | 1.46 (0.98, 2.08)    | 425                 | 58                | 3.22 (2.45, 4.17)    |
| Liraglutide                   | 358         | 46                                              | 2.76 (2.02, 3.68) | 422                  | 30                                             | 1.47 (0.99, 2.10) | 402                  | 68                  | 3.83 (2.97, 4.85) |                      |
| Sitagliptin                   | 343         | 35                                              | 2.20 (1.53, 3.06) | 405                  | 27                                             | 1.41 (0.93, 2.05) | 388                  | 57                  | 3.46 (2.62, 4.48) |                      |

(continued)

|                  |             | <b>Diabetic peripheral neuropathy (DPN)</b> |                 |                      |
|------------------|-------------|---------------------------------------------|-----------------|----------------------|
| <b>Subgroups</b> | Treatment   | N <sup>1</sup>                              | Ne <sup>2</sup> | Rate/100yrs (95% CI) |
| <b>Sex</b>       |             |                                             |                 |                      |
| Male             | Glargine    | 470                                         | 253             | 16.17 (14.23, 18.28) |
|                  | Glimepiride | 432                                         | 268             | 19.60 (17.32, 22.09) |
|                  | Liraglutide | 433                                         | 255             | 18.57 (16.36, 21.00) |
|                  | Sitagliptin | 431                                         | 246             | 17.75 (15.60, 20.11) |
|                  |             |                                             |                 |                      |
| Female           | Glargine    | 281                                         | 140             | 14.60 (12.28, 17.23) |
|                  | Glimepiride | 296                                         | 159             | 16.29 (13.86, 19.03) |
|                  | Liraglutide | 271                                         | 127             | 12.63 (10.53, 15.03) |
|                  | Sitagliptin | 292                                         | 159             | 15.68 (13.33, 18.31) |
|                  |             |                                             |                 |                      |
| <b>Race</b>      |             |                                             |                 |                      |
| White            | Glargine    | 499                                         | 274             | 16.47 (14.58, 18.54) |
|                  | Glimepiride | 474                                         | 287             | 19.03 (16.89, 21.36) |
|                  | Liraglutide | 450                                         | 255             | 17.26 (15.21, 19.52) |
|                  | Sitagliptin | 464                                         | 255             | 16.43 (14.48, 18.58) |
|                  |             |                                             |                 |                      |
| Black            | Glargine    | 154                                         | 72              | 13.79 (10.79, 17.37) |
|                  | Glimepiride | 153                                         | 84              | 16.76 (13.37, 20.76) |
|                  | Liraglutide | 145                                         | 64              | 12.17 (9.37, 15.54)  |
|                  | Sitagliptin | 145                                         | 86              | 18.21 (14.57, 22.49) |
|                  |             |                                             |                 |                      |
| All Others       | Glargine    | 98                                          | 47              | 13.89 (10.21, 18.47) |
|                  | Glimepiride | 101                                         | 56              | 16.76 (12.66, 21.77) |
|                  | Liraglutide | 109                                         | 63              | 16.78 (12.90, 21.47) |
|                  | Sitagliptin | 114                                         | 64              | 17.00 (13.09, 21.71) |

(continued)

|                    |             | <b>Diabetic peripheral neuropathy (DPN)</b> |                 |                      |
|--------------------|-------------|---------------------------------------------|-----------------|----------------------|
| <b>Subgroups</b>   | Treatment   | N <sup>1</sup>                              | Ne <sup>2</sup> | Rate/100yrs (95% CI) |
| <b>Ethnicity</b>   |             |                                             |                 |                      |
| Hispanic           | Glargine    | 146                                         | 67              | 13.07 (10.13, 16.60) |
|                    | Glimepiride | 151                                         | 85              | 16.99 (13.57, 21.01) |
|                    | Liraglutide | 140                                         | 67              | 13.19 (10.22, 16.75) |
|                    | Sitagliptin | 165                                         | 75              | 13.10 (10.30, 16.42) |
|                    |             |                                             |                 |                      |
| Non-Hisp           | Glargine    | 599                                         | 322             | 16.14 (14.43, 18.00) |
|                    | Glimepiride | 570                                         | 339             | 18.68 (16.74, 20.77) |
|                    | Liraglutide | 561                                         | 314             | 16.91 (15.09, 18.89) |
|                    | Sitagliptin | 551                                         | 328             | 18.22 (16.31, 20.31) |
|                    |             |                                             |                 |                      |
| <b>Age (years)</b> |             |                                             |                 |                      |
| <45                | Glargine    | 113                                         | 45              | 10.84 (7.91, 14.50)  |
|                    | Glimepiride | 114                                         | 54              | 13.54 (10.17, 17.67) |
|                    | Liraglutide | 107                                         | 44              | 10.33 (7.51, 13.87)  |
|                    | Sitagliptin | 107                                         | 44              | 11.10 (8.07, 14.90)  |
|                    |             |                                             |                 |                      |
| 45-59              | Glargine    | 380                                         | 182             | 13.61 (11.70, 15.73) |
|                    | Glimepiride | 356                                         | 184             | 15.23 (13.11, 17.60) |
|                    | Liraglutide | 349                                         | 173             | 14.25 (12.21, 16.54) |
|                    | Sitagliptin | 369                                         | 197             | 15.71 (13.60, 18.07) |
|                    |             |                                             |                 |                      |
| 60+                | Glargine    | 258                                         | 166             | 21.53 (18.38, 25.06) |
|                    | Glimepiride | 258                                         | 189             | 25.66 (22.13, 29.59) |
|                    | Liraglutide | 248                                         | 165             | 22.33 (19.05, 26.01) |
|                    | Sitagliptin | 247                                         | 164             | 21.86 (18.64, 25.47) |

(continued)

| Subgroups                         | Treatment   | Diabetic peripheral neuropathy (DPN) |                 |                      |
|-----------------------------------|-------------|--------------------------------------|-----------------|----------------------|
|                                   |             | N <sup>1</sup>                       | Ne <sup>2</sup> | Rate/100yrs (95% CI) |
| <b>BMI<br/>(kg/m<sup>2</sup>)</b> |             |                                      |                 |                      |
| 18.2-30.7                         | Glargine    | 275                                  | 131             | 13.32 (11.14, 15.81) |
|                                   | Glimepiride | 262                                  | 141             | 15.37 (12.94, 18.13) |
|                                   | Liraglutide | 245                                  | 129             | 14.88 (12.43, 17.68) |
|                                   | Sitagliptin | 278                                  | 144             | 15.21 (12.83, 17.91) |
| 30.7-36.3                         | Glargine    | 233                                  | 126             | 16.39 (13.65, 19.51) |
|                                   | Glimepiride | 242                                  | 134             | 16.40 (13.74, 19.43) |
|                                   | Liraglutide | 245                                  | 132             | 16.36 (13.69, 19.40) |
|                                   | Sitagliptin | 232                                  | 132             | 17.62 (14.74, 20.90) |
| 36.3-74.3                         | Glargine    | 242                                  | 136             | 17.64 (14.80, 20.86) |
|                                   | Glimepiride | 222                                  | 151             | 25.06 (21.22, 29.39) |
|                                   | Liraglutide | 212                                  | 119             | 16.97 (14.06, 20.31) |
|                                   | Sitagliptin | 211                                  | 127             | 18.07 (15.07, 21.50) |
| <b>HbA1c<br/>(%)</b>              |             |                                      |                 |                      |
| 6.8-7.2                           | Glargine    | 285                                  | 161             | 17.28 (14.72, 20.17) |
|                                   | Glimepiride | 289                                  | 162             | 16.92 (14.42, 19.74) |
|                                   | Liraglutide | 282                                  | 136             | 13.75 (11.53, 16.26) |
|                                   | Sitagliptin | 282                                  | 162             | 17.41 (14.83, 20.30) |
| 7.2-7.7                           | Glargine    | 238                                  | 122             | 15.20 (12.62, 18.15) |
|                                   | Glimepiride | 237                                  | 141             | 18.57 (15.63, 21.90) |
|                                   | Liraglutide | 211                                  | 122             | 17.20 (14.28, 20.54) |
|                                   | Sitagliptin | 231                                  | 126             | 16.10 (13.41, 19.17) |
| 7.7-8.5                           | Glargine    | 228                                  | 110             | 13.93 (11.44, 16.78) |
|                                   | Glimepiride | 202                                  | 124             | 19.79 (16.46, 23.59) |
|                                   | Liraglutide | 211                                  | 124             | 18.23 (15.17, 21.74) |
|                                   | Sitagliptin | 210                                  | 117             | 17.02 (14.08, 20.40) |

(continued)

| Subgroups                               | Treatment   | Diabetic peripheral neuropathy (DPN) |                 |                      |
|-----------------------------------------|-------------|--------------------------------------|-----------------|----------------------|
|                                         |             | N <sup>1</sup>                       | Ne <sup>2</sup> | Rate/100yrs (95% CI) |
| <b>Diabetes Duration (yrs)</b><br>0-2.5 | Glargine    | 249                                  | 113             | 13.56 (11.18, 16.31) |
|                                         | Glimepiride | 253                                  | 143             | 17.06 (14.38, 20.10) |
|                                         | Liraglutide | 256                                  | 122             | 13.59 (11.29, 16.23) |
|                                         | Sitagliptin | 258                                  | 137             | 15.97 (13.40, 18.87) |
|                                         |             |                                      |                 |                      |
| 2.5-5.4                                 | Glargine    | 281                                  | 164             | 17.71 (15.10, 20.63) |
|                                         | Glimepiride | 221                                  | 130             | 17.91 (14.97, 21.27) |
|                                         | Liraglutide | 227                                  | 135             | 18.07 (15.15, 21.39) |
|                                         | Sitagliptin | 229                                  | 132             | 17.66 (14.77, 20.94) |
| 5.4-11.2                                | Glargine    | 221                                  | 116             | 15.17 (12.54, 18.20) |
|                                         | Glimepiride | 254                                  | 154             | 19.75 (16.76, 23.13) |
|                                         | Liraglutide | 221                                  | 125             | 17.03 (14.17, 20.29) |
|                                         | Sitagliptin | 235                                  | 136             | 17.21 (14.44, 20.36) |

<sup>1</sup>Number at risk; <sup>2</sup>Number of events

Note that all subgroup factors were assessed at baseline.

**Table S5.B:** Sub-group analyses of major cardiovascular outcomes stratified according to seven pre-specified baseline factors and a post-hoc analysis of those who reported a history of MI or Stroke at least one year prior. Since the analysis did not correct for multiple subgroup factors, per the Journal statistical guidelines, only a descriptive presentation is provided that includes the number of outcome cases (*Ne*) and the crude rate (hazard) per 100 patient years of follow-up with uncorrected 95% confidence limits.

| Subgroups   | Treatment   | Any cardiovascular disease events |                 |                      | Major adverse cardiovascular events (MACE) |                 |                      | Hospitalized heart failure |                 |                      |
|-------------|-------------|-----------------------------------|-----------------|----------------------|--------------------------------------------|-----------------|----------------------|----------------------------|-----------------|----------------------|
|             |             | N <sup>1</sup>                    | Ne <sup>2</sup> | Rate/100yrs (95% CI) | N <sup>1</sup>                             | Ne <sup>2</sup> | Rate/100yrs (95% CI) | N <sup>1</sup>             | Ne <sup>2</sup> | Rate/100yrs (95% CI) |
| <b>Sex</b>  |             |                                   |                 |                      |                                            |                 |                      |                            |                 |                      |
| Male        | Glargine    | 808                               | 88              | 2.31 (1.85, 2.85)    | 808                                        | 52              | 1.33 (0.99, 1.75)    | 808                        | 18              | 0.46 (0.27, 0.72)    |
|             | Glimepiride | 777                               | 84              | 2.29 (1.82, 2.83)    | 777                                        | 38              | 1.00 (0.71, 1.37)    | 777                        | 21              | 0.55 (0.34, 0.84)    |
|             | Liraglutide | 818                               | 68              | 1.75 (1.36, 2.22)    | 818                                        | 40              | 1.01 (0.72, 1.38)    | 818                        | 9               | 0.22 (0.10, 0.43)    |
|             | Sitagliptin | 795                               | 97              | 2.61 (2.12, 3.19)    | 795                                        | 55              | 1.44 (1.08, 1.87)    | 795                        | 21              | 0.54 (0.33, 0.83)    |
| Female      | Glargine    | 449                               | 25              | 1.12 (0.72, 1.65)    | 449                                        | 13              | 0.58 (0.31, 0.98)    | 449                        | 8               | 0.35 (0.15, 0.70)    |
|             | Glimepiride | 470                               | 31              | 1.34 (0.91, 1.90)    | 470                                        | 21              | 0.90 (0.56, 1.37)    | 470                        | 9               | 0.38 (0.18, 0.73)    |
|             | Liraglutide | 433                               | 15              | 0.68 (0.38, 1.12)    | 433                                        | 8               | 0.36 (0.15, 0.71)    | 433                        | 5               | 0.22 (0.07, 0.52)    |
|             | Sitagliptin | 469                               | 24              | 1.03 (0.66, 1.53)    | 469                                        | 14              | 0.59 (0.32, 0.99)    | 469                        | 9               | 0.38 (0.17, 0.72)    |
| <b>Race</b> |             |                                   |                 |                      |                                            |                 |                      |                            |                 |                      |
| White       | Glargine    | 833                               | 74              | 1.87 (1.47, 2.34)    | 833                                        | 43              | 1.06 (0.77, 1.43)    | 833                        | 13              | 0.32 (0.17, 0.54)    |
|             | Glimepiride | 804                               | 83              | 2.19 (1.74, 2.71)    | 804                                        | 38              | 0.97 (0.69, 1.33)    | 804                        | 19              | 0.48 (0.29, 0.75)    |
|             | Liraglutide | 808                               | 58              | 1.48 (1.12, 1.91)    | 808                                        | 31              | 0.78 (0.53, 1.11)    | 808                        | 8               | 0.20 (0.09, 0.39)    |
|             | Sitagliptin | 850                               | 88              | 2.21 (1.77, 2.72)    | 850                                        | 46              | 1.12 (0.82, 1.50)    | 850                        | 19              | 0.46 (0.27, 0.71)    |
| Black       | Glargine    | 251                               | 24              | 1.96 (1.26, 2.92)    | 251                                        | 14              | 1.13 (0.62, 1.89)    | 251                        | 10              | 0.81 (0.39, 1.49)    |
|             | Glimepiride | 270                               | 24              | 1.82 (1.17, 2.71)    | 270                                        | 17              | 1.26 (0.74, 2.02)    | 270                        | 11              | 0.82 (0.41, 1.46)    |
|             | Liraglutide | 250                               | 16              | 1.29 (0.73, 2.09)    | 250                                        | 10              | 0.79 (0.38, 1.46)    | 250                        | 4               | 0.32 (0.09, 0.81)    |
|             | Sitagliptin | 225                               | 24              | 2.18 (1.39, 3.24)    | 225                                        | 17              | 1.52 (0.88, 2.43)    | 225                        | 7               | 0.62 (0.25, 1.28)    |
| All Others  | Glargine    | 173                               | 15              | 1.76 (0.98, 2.90)    | 173                                        | 8               | 0.92 (0.40, 1.82)    | 173                        | 3               | 0.34 (0.07, 1.00)    |
|             | Glimepiride | 173                               | 8               | 0.92 (0.40, 1.80)    | 173                                        | 4               | 0.45 (0.12, 1.15)    | 173                        | 0               | 0.00 (0.00, 0.42)    |
|             | Liraglutide | 193                               | 9               | 0.96 (0.44, 1.82)    | 193                                        | 7               | 0.74 (0.30, 1.53)    | 193                        | 2               | 0.21 (0.03, 0.75)    |
|             | Sitagliptin | 189                               | 9               | 0.94 (0.43, 1.79)    | 189                                        | 6               | 0.62 (0.23, 1.35)    | 189                        | 4               | 0.41 (0.11, 1.06)    |

(continued)

| Subgroups          | Treatment   | Any cardiovascular disease events |                 |                      | Major adverse cardiovascular events (MACE) |                 |                      | Hospitalized heart failure |                 |                      |
|--------------------|-------------|-----------------------------------|-----------------|----------------------|--------------------------------------------|-----------------|----------------------|----------------------------|-----------------|----------------------|
|                    |             | N <sup>1</sup>                    | Ne <sup>2</sup> | Rate/100yrs (95% CI) | N <sup>1</sup>                             | Ne <sup>2</sup> | Rate/100yrs (95% CI) | N <sup>1</sup>             | Ne <sup>2</sup> | Rate/100yrs (95% CI) |
| <b>Ethnicity</b>   |             |                                   |                 |                      |                                            |                 |                      |                            |                 |                      |
| Hispanic           | Glargine    | 218                               | 12              | 1.14 (0.59, 1.99)    | 218                                        | 6               | 0.56 (0.21, 1.22)    | 218                        | 1               | 0.09 (0.00, 0.52)    |
|                    | Glimepiride | 231                               | 12              | 1.06 (0.55, 1.85)    | 231                                        | 7               | 0.61 (0.25, 1.26)    | 231                        | 2               | 0.17 (0.02, 0.63)    |
|                    | Liraglutide | 229                               | 8               | 0.70 (0.30, 1.39)    | 229                                        | 5               | 0.44 (0.14, 1.02)    | 229                        | 3               | 0.26 (0.05, 0.76)    |
|                    | Sitagliptin | 238                               | 11              | 0.94 (0.47, 1.69)    | 238                                        | 7               | 0.60 (0.24, 1.23)    | 238                        | 5               | 0.42 (0.14, 0.99)    |
| Non-Hisp           | Glargine    | 1028                              | 99              | 2.00 (1.63, 2.44)    | 1028                                       | 58              | 1.15 (0.87, 1.49)    | 1028                       | 25              | 0.49 (0.32, 0.72)    |
|                    | Glimepiride | 1002                              | 103             | 2.15 (1.76, 2.61)    | 1002                                       | 52              | 1.05 (0.79, 1.38)    | 1002                       | 28              | 0.56 (0.37, 0.81)    |
|                    | Liraglutide | 1017                              | 75              | 1.52 (1.19, 1.90)    | 1017                                       | 43              | 0.86 (0.62, 1.16)    | 1017                       | 11              | 0.22 (0.11, 0.39)    |
|                    | Sitagliptin | 1016                              | 109             | 2.26 (1.85, 2.72)    | 1016                                       | 61              | 1.23 (0.94, 1.58)    | 1016                       | 25              | 0.50 (0.32, 0.73)    |
| <b>Age (years)</b> |             |                                   |                 |                      |                                            |                 |                      |                            |                 |                      |
| <45                | Glargine    | 150                               | 6               | 0.82 (0.30, 1.79)    | 150                                        | 5               | 0.68 (0.22, 1.60)    | 150                        | 0               | 0.00 (0.00, 0.50)    |
|                    | Glimepiride | 162                               | 4               | 0.51 (0.14, 1.31)    | 162                                        | 1               | 0.13 (0.00, 0.70)    | 162                        | 1               | 0.13 (0.00, 0.70)    |
|                    | Liraglutide | 153                               | 2               | 0.25 (0.03, 0.92)    | 153                                        | 1               | 0.13 (0.00, 0.71)    | 153                        | 1               | 0.13 (0.00, 0.71)    |
|                    | Sitagliptin | 151                               | 4               | 0.53 (0.14, 1.35)    | 151                                        | 4               | 0.53 (0.14, 1.35)    | 151                        | 0               | 0.00 (0.00, 0.48)    |
| 45-59              | Glargine    | 604                               | 38              | 1.28 (0.91, 1.76)    | 604                                        | 25              | 0.83 (0.54, 1.23)    | 604                        | 5               | 0.17 (0.05, 0.39)    |
|                    | Glimepiride | 553                               | 40              | 1.49 (1.06, 2.02)    | 553                                        | 24              | 0.87 (0.56, 1.30)    | 553                        | 12              | 0.44 (0.23, 0.76)    |
|                    | Liraglutide | 559                               | 38              | 1.38 (0.98, 1.90)    | 559                                        | 22              | 0.79 (0.50, 1.20)    | 559                        | 7               | 0.25 (0.10, 0.51)    |
|                    | Sitagliptin | 602                               | 37              | 1.24 (0.88, 1.71)    | 602                                        | 21              | 0.70 (0.43, 1.07)    | 602                        | 8               | 0.26 (0.11, 0.52)    |
| 60+                | Glargine    | 503                               | 69              | 2.94 (2.29, 3.72)    | 503                                        | 35              | 1.44 (1.00, 2.00)    | 503                        | 21              | 0.86 (0.53, 1.31)    |
|                    | Glimepiride | 532                               | 71              | 2.83 (2.21, 3.57)    | 532                                        | 34              | 1.30 (0.90, 1.82)    | 532                        | 17              | 0.64 (0.37, 1.03)    |
|                    | Liraglutide | 539                               | 43              | 1.68 (1.21, 2.26)    | 539                                        | 25              | 0.96 (0.62, 1.42)    | 539                        | 6               | 0.23 (0.08, 0.49)    |
|                    | Sitagliptin | 511                               | 80              | 3.46 (2.74, 4.31)    | 511                                        | 44              | 1.82 (1.32, 2.44)    | 511                        | 22              | 0.89 (0.56, 1.35)    |

(continued)

| Subgroups                                  | Treatment   | Any cardiovascular disease events |                 |                      | Major adverse cardiovascular events (MACE) |                 |                      | Hospitalized heart failure |                 |                      |
|--------------------------------------------|-------------|-----------------------------------|-----------------|----------------------|--------------------------------------------|-----------------|----------------------|----------------------------|-----------------|----------------------|
|                                            |             | N <sup>1</sup>                    | Ne <sup>2</sup> | Rate/100yrs (95% CI) | N <sup>1</sup>                             | Ne <sup>2</sup> | Rate/100yrs (95% CI) | N <sup>1</sup>             | Ne <sup>2</sup> | Rate/100yrs (95% CI) |
| <b>BMI (kg/m<sup>2</sup>)</b><br>18.2-30.7 | Glargine    | 408                               | 37              | 1.87 (1.32, 2.58)    | 408                                        | 23              | 1.14 (0.72, 1.71)    | 408                        | 6               | 0.29 (0.11, 0.64)    |
|                                            | Glimepiride | 423                               | 36              | 1.78 (1.24, 2.46)    | 423                                        | 16              | 0.77 (0.44, 1.25)    | 423                        | 4               | 0.19 (0.05, 0.48)    |
|                                            | Liraglutide | 394                               | 19              | 0.98 (0.59, 1.53)    | 394                                        | 9               | 0.46 (0.21, 0.87)    | 394                        | 1               | 0.05 (0.00, 0.28)    |
|                                            | Sitagliptin | 444                               | 42              | 2.01 (1.45, 2.72)    | 444                                        | 28              | 1.31 (0.87, 1.90)    | 444                        | 8               | 0.37 (0.16, 0.73)    |
|                                            |             |                                   |                 |                      |                                            |                 |                      |                            |                 |                      |
| 30.7-36.3                                  | Glargine    | 421                               | 31              | 1.51 (1.03, 2.15)    | 421                                        | 14              | 0.67 (0.37, 1.13)    | 421                        | 8               | 0.39 (0.17, 0.76)    |
|                                            | Glimepiride | 401                               | 41              | 2.11 (1.52, 2.87)    | 401                                        | 21              | 1.05 (0.65, 1.61)    | 401                        | 13              | 0.65 (0.35, 1.11)    |
|                                            | Liraglutide | 443                               | 35              | 1.62 (1.13, 2.25)    | 443                                        | 21              | 0.96 (0.59, 1.47)    | 443                        | 6               | 0.27 (0.10, 0.59)    |
|                                            | Sitagliptin | 406                               | 38              | 1.96 (1.39, 2.69)    | 406                                        | 23              | 1.16 (0.73, 1.74)    | 406                        | 9               | 0.45 (0.20, 0.85)    |
| 36.3-74.3                                  | Glargine    | 426                               | 45              | 2.24 (1.63, 3.00)    | 426                                        | 28              | 1.36 (0.90, 1.97)    | 426                        | 12              | 0.57 (0.30, 1.00)    |
|                                            | Glimepiride | 420                               | 37              | 1.85 (1.30, 2.55)    | 420                                        | 22              | 1.07 (0.67, 1.63)    | 420                        | 13              | 0.63 (0.34, 1.08)    |
|                                            | Liraglutide | 412                               | 29              | 1.46 (0.98, 2.09)    | 412                                        | 18              | 0.89 (0.53, 1.41)    | 412                        | 7               | 0.34 (0.14, 0.71)    |
|                                            | Sitagliptin | 412                               | 41              | 2.04 (1.47, 2.77)    | 412                                        | 18              | 0.87 (0.52, 1.38)    | 412                        | 13              | 0.63 (0.33, 1.07)    |
| <b>HbA1c (%)</b><br>6.8-7.2                | Glargine    | 474                               | 47              | 2.06 (1.51, 2.74)    | 474                                        | 28              | 1.20 (0.80, 1.74)    | 474                        | 13              | 0.55 (0.29, 0.95)    |
|                                            | Glimepiride | 494                               | 41              | 1.69 (1.22, 2.30)    | 494                                        | 23              | 0.93 (0.59, 1.39)    | 494                        | 8               | 0.32 (0.14, 0.63)    |
|                                            | Liraglutide | 496                               | 28              | 1.16 (0.77, 1.68)    | 496                                        | 18              | 0.74 (0.44, 1.17)    | 496                        | 5               | 0.20 (0.07, 0.48)    |
|                                            | Sitagliptin | 465                               | 32              | 1.42 (0.97, 2.01)    | 465                                        | 16              | 0.70 (0.40, 1.13)    | 465                        | 8               | 0.35 (0.15, 0.68)    |
|                                            |             |                                   |                 |                      |                                            |                 |                      |                            |                 |                      |
| 7.2-7.7                                    | Glargine    | 389                               | 38              | 2.03 (1.43, 2.78)    | 389                                        | 21              | 1.09 (0.68, 1.67)    | 389                        | 9               | 0.47 (0.21, 0.88)    |
|                                            | Glimepiride | 399                               | 43              | 2.28 (1.65, 3.07)    | 399                                        | 21              | 1.08 (0.67, 1.65)    | 399                        | 12              | 0.61 (0.32, 1.07)    |
|                                            | Liraglutide | 370                               | 28              | 1.53 (1.01, 2.21)    | 370                                        | 12              | 0.64 (0.33, 1.12)    | 370                        | 6               | 0.32 (0.12, 0.70)    |
|                                            | Sitagliptin | 411                               | 42              | 2.12 (1.53, 2.87)    | 411                                        | 25              | 1.24 (0.80, 1.82)    | 411                        | 10              | 0.49 (0.23, 0.89)    |
| 7.7-8.5                                    | Glargine    | 394                               | 28              | 1.49 (0.99, 2.15)    | 394                                        | 16              | 0.83 (0.48, 1.36)    | 394                        | 4               | 0.21 (0.06, 0.53)    |
|                                            | Glimepiride | 354                               | 31              | 1.85 (1.26, 2.62)    | 354                                        | 15              | 0.87 (0.49, 1.43)    | 354                        | 10              | 0.58 (0.28, 1.06)    |
|                                            | Liraglutide | 385                               | 27              | 1.45 (0.96, 2.12)    | 385                                        | 18              | 0.96 (0.57, 1.52)    | 385                        | 3               | 0.16 (0.03, 0.46)    |
|                                            | Sitagliptin | 388                               | 47              | 2.59 (1.90, 3.45)    | 388                                        | 28              | 1.50 (1.00, 2.17)    | 388                        | 12              | 0.63 (0.33, 1.11)    |

(continued)



| Subgroups                            | Treatment   | Any cardiovascular disease events |                 |                      | Major adverse cardiovascular events (MACE) |                 |                      | Hospitalized heart failure |                 |                      |
|--------------------------------------|-------------|-----------------------------------|-----------------|----------------------|--------------------------------------------|-----------------|----------------------|----------------------------|-----------------|----------------------|
|                                      |             | N <sup>1</sup>                    | Ne <sup>2</sup> | Rate/100yrs (95% CI) | N <sup>1</sup>                             | Ne <sup>2</sup> | Rate/100yrs (95% CI) | N <sup>1</sup>             | Ne <sup>2</sup> | Rate/100yrs (95% CI) |
| <b>Diabetes Duration (yrs)</b>       |             |                                   |                 |                      |                                            |                 |                      |                            |                 |                      |
| 0-2.5                                | Glargine    | 411                               | 41              | 2.14 (1.53, 2.90)    | 411                                        | 25              | 1.28 (0.83, 1.88)    | 411                        | 6               | 0.30 (0.11, 0.65)    |
|                                      | Glimepiride | 415                               | 42              | 2.14 (1.55, 2.90)    | 415                                        | 20              | 0.99 (0.60, 1.53)    | 415                        | 12              | 0.59 (0.31, 1.03)    |
|                                      | Liraglutide | 431                               | 33              | 1.62 (1.11, 2.27)    | 431                                        | 21              | 1.01 (0.63, 1.55)    | 431                        | 8               | 0.38 (0.16, 0.75)    |
|                                      | Sitagliptin | 424                               | 38              | 1.87 (1.32, 2.57)    | 424                                        | 16              | 0.77 (0.44, 1.25)    | 424                        | 14              | 0.67 (0.37, 1.12)    |
| 2.5-5.4                              | Glargine    | 458                               | 42              | 1.85 (1.33, 2.50)    | 458                                        | 25              | 1.08 (0.70, 1.6)     | 458                        | 11              | 0.47 (0.23, 0.84)    |
|                                      | Glimepiride | 390                               | 43              | 2.23 (1.61, 3.01)    | 390                                        | 26              | 1.32 (0.86, 1.93)    | 390                        | 13              | 0.65 (0.35, 1.12)    |
|                                      | Liraglutide | 389                               | 25              | 1.28 (0.83, 1.90)    | 389                                        | 16              | 0.81 (0.46, 1.32)    | 389                        | 3               | 0.15 (0.03, 0.44)    |
|                                      | Sitagliptin | 427                               | 42              | 2.01 (1.45, 2.72)    | 427                                        | 28              | 1.32 (0.88, 1.90)    | 427                        | 7               | 0.33 (0.13, 0.67)    |
| 5.4-11.2                             | Glargine    | 388                               | 30              | 1.62 (1.09, 2.31)    | 388                                        | 15              | 0.79 (0.44, 1.31)    | 388                        | 9               | 0.48 (0.22, 0.91)    |
|                                      | Glimepiride | 442                               | 30              | 1.43 (0.96, 2.04)    | 442                                        | 13              | 0.60 (0.32, 1.03)    | 442                        | 5               | 0.23 (0.08, 0.54)    |
|                                      | Liraglutide | 431                               | 25              | 1.18 (0.77, 1.75)    | 431                                        | 11              | 0.51 (0.26, 0.92)    | 431                        | 3               | 0.14 (0.03, 0.41)    |
|                                      | Sitagliptin | 412                               | 41              | 2.13 (1.53, 2.89)    | 412                                        | 25              | 1.27 (0.82, 1.87)    | 412                        | 9               | 0.45 (0.21, 0.85)    |
| <b>Stroke/MI History<sup>3</sup></b> |             |                                   |                 |                      |                                            |                 |                      |                            |                 |                      |
| No                                   | Glargine    | 1177                              | 95              | 1.66 (1.35, 2.03)    | 1177                                       | 55              | 0.95 (0.71, 1.23)    | 1177                       | 22              | 0.38 (0.24, 0.57)    |
|                                      | Glimepiride | 1172                              | 92              | 1.62 (1.31, 1.99)    | 1172                                       | 48              | 0.83 (0.61, 1.10)    | 1172                       | 22              | 0.38 (0.24, 0.57)    |
|                                      | Liraglutide | 1174                              | 71              | 1.24 (0.96, 1.56)    | 1174                                       | 44              | 0.76 (0.55, 1.02)    | 1174                       | 14              | 0.24 (0.13, 0.40)    |
|                                      | Sitagliptin | 1173                              | 90              | 1.58 (1.27, 1.95)    | 1173                                       | 50              | 0.86 (0.64, 1.14)    | 1173                       | 22              | 0.38 (0.24, 0.57)    |
| Yes                                  | Glargine    | 80                                | 18              | 5.37 (3.18, 8.48)    | 80                                         | 10              | 2.81 (1.35, 5.17)    | 80                         | 4               | 1.09 (0.30, 2.80)    |
|                                      | Glimepiride | 75                                | 23              | 7.63 (4.84, 11.45)   | 75                                         | 11              | 3.23 (1.61, 5.78)    | 75                         | 8               | 2.26 (0.97, 4.45)    |
|                                      | Liraglutide | 77                                | 12              | 3.43 (1.77, 5.99)    | 77                                         | 4               | 1.08 (0.29, 2.77)    | 77                         | 0               | 0.00 (0.00, 0.98)    |
|                                      | Sitagliptin | 91                                | 31              | 8.56 (5.82, 12.15)   | 91                                         | 19              | 4.82 (2.90, 7.53)    | 91                         | 8               | 1.90 (0.82, 3.74)    |

<sup>1</sup>Number at risk; <sup>2</sup>Number of events

<sup>3</sup>Post-hoc analysis of those who had a history of stroke or MI  $\geq$  1 year before randomization. Stroke within 1 year of randomization was a study exclusion criteria. Note that all subgroup factors were assessed at baseline.

**Table S5.C:** Sub-group analyses of mortality outcomes stratified according to seven pre-specified baseline factors and a post-hoc analysis of those who reported a history of MI or Stroke at least one year prior. Since the analysis did not correct for multiple subgroup factors, per the Journal statistical guidelines, only a descriptive presentation is provided that includes the number of outcome cases (*Ne*) and the crude rate (hazard) per 100 patient years of follow-up with uncorrected 95% confidence limits.

| Subgroups   | Treatment   | Cardiovascular death |                 |                   | All deaths     |                 |                      |
|-------------|-------------|----------------------|-----------------|-------------------|----------------|-----------------|----------------------|
|             |             | N <sup>1</sup>       | Ne <sup>2</sup> | Rate (95% CI)     | N <sup>1</sup> | Ne <sup>2</sup> | Rate/100yrs (95% CI) |
| <b>Sex</b>  |             |                      |                 |                   |                |                 |                      |
| Male        | Glargine    | 808                  | 19              | 0.48 (0.29, 0.74) | 811            | 37              | 0.90 (0.63, 1.24)    |
|             | Glimepiride | 777                  | 10              | 0.26 (0.12, 0.47) | 778            | 33              | 0.83 (0.57, 1.17)    |
|             | Liraglutide | 818                  | 9               | 0.22 (0.10, 0.42) | 823            | 24              | 0.58 (0.37, 0.86)    |
|             | Sitagliptin | 795                  | 18              | 0.46 (0.27, 0.73) | 798            | 33              | 0.82 (0.56, 1.15)    |
| Female      | Glargine    | 449                  | 2               | 0.09 (0.01, 0.32) | 452            | 5               | 0.21 (0.07, 0.49)    |
|             | Glimepiride | 470                  | 6               | 0.25 (0.09, 0.55) | 476            | 10              | 0.41 (0.20, 0.75)    |
|             | Liraglutide | 433                  | 0               | 0.00 (0.00, 0.16) | 439            | 3               | 0.13 (0.03, 0.37)    |
|             | Sitagliptin | 469                  | 3               | 0.13 (0.03, 0.37) | 469            | 8               | 0.32 (0.14, 0.64)    |
| <b>Race</b> |             |                      |                 |                   |                |                 |                      |
| White       | Glargine    | 833                  | 13              | 0.31 (0.17, 0.54) | 837            | 26              | 0.61 (0.40, 0.89)    |
|             | Glimepiride | 804                  | 11              | 0.28 (0.14, 0.49) | 808            | 33              | 0.80 (0.55, 1.13)    |
|             | Liraglutide | 808                  | 6               | 0.15 (0.05, 0.32) | 815            | 19              | 0.46 (0.27, 0.71)    |
|             | Sitagliptin | 850                  | 13              | 0.31 (0.16, 0.53) | 853            | 29              | 0.67 (0.45, 0.96)    |
| Black       | Glargine    | 251                  | 6               | 0.47 (0.17, 1.03) | 253            | 11              | 0.84 (0.42, 1.50)    |
|             | Glimepiride | 270                  | 4               | 0.29 (0.08, 0.74) | 271            | 9               | 0.63 (0.29, 1.20)    |
|             | Liraglutide | 250                  | 2               | 0.16 (0.02, 0.56) | 251            | 6               | 0.46 (0.17, 0.99)    |
|             | Sitagliptin | 225                  | 5               | 0.44 (0.14, 1.02) | 225            | 7               | 0.59 (0.24, 1.21)    |
| All Others  | Glargine    | 173                  | 2               | 0.23 (0.03, 0.82) | 173            | 5               | 0.55 (0.18, 1.28)    |
|             | Glimepiride | 173                  | 1               | 0.11 (0.00, 0.63) | 175            | 1               | 0.11 (0.00, 0.61)    |
|             | Liraglutide | 193                  | 1               | 0.10 (0.00, 0.58) | 196            | 2               | 0.20 (0.02, 0.71)    |
|             | Sitagliptin | 189                  | 3               | 0.31 (0.06, 0.90) | 189            | 5               | 0.51 (0.17, 1.19)    |

(continued)

| Subgroups          | Treatment   | Cardiovascular death |                 |                   | All deaths     |                 |                      |
|--------------------|-------------|----------------------|-----------------|-------------------|----------------|-----------------|----------------------|
|                    |             | N <sup>1</sup>       | Ne <sup>2</sup> | Rate (95% CI)     | N <sup>1</sup> | Ne <sup>2</sup> | Rate/100yrs (95% CI) |
| <b>Ethnicity</b>   |             |                      |                 |                   |                |                 |                      |
| Hispanic           | Glargine    | 218                  | 2               | 0.19 (0.02, 0.67) | 220            | 4               | 0.35 (0.10, 0.90)    |
|                    | Glimepiride | 231                  | 1               | 0.09 (0.00, 0.48) | 234            | 4               | 0.33 (0.09, 0.84)    |
|                    | Liraglutide | 229                  | 1               | 0.09 (0.00, 0.48) | 234            | 2               | 0.16 (0.02, 0.59)    |
|                    | Sitagliptin | 238                  | 3               | 0.25 (0.05, 0.74) | 240            | 4               | 0.32 (0.09, 0.82)    |
| Non-Hisp           | Glargine    | 1028                 | 18              | 0.35 (0.21, 0.55) | 1032           | 37              | 0.70 (0.49, 0.96)    |
|                    | Glimepiride | 1002                 | 15              | 0.30 (0.17, 0.49) | 1006           | 39              | 0.76 (0.54, 1.04)    |
|                    | Liraglutide | 1017                 | 8               | 0.16 (0.07, 0.31) | 1022           | 25              | 0.48 (0.31, 0.70)    |
|                    | Sitagliptin | 1016                 | 18              | 0.35 (0.21, 0.56) | 1017           | 37              | 0.71 (0.50, 0.98)    |
| <b>Age (years)</b> |             |                      |                 |                   |                |                 |                      |
| <45                | Glargine    | 150                  | 1               | 0.14 (0.00, 0.75) | 152            | 3               | 0.38 (0.08, 1.10)    |
|                    | Glimepiride | 162                  | 0               | 0.00 (0.00, 0.46) | 165            | 0               | 0.00 (0.00, 0.43)    |
|                    | Liraglutide | 153                  | 0               | 0.00 (0.00, 0.47) | 154            | 0               | 0.00 (0.00, 0.45)    |
|                    | Sitagliptin | 151                  | 1               | 0.13 (0.00, 0.73) | 151            | 1               | 0.13 (0.00, 0.70)    |
| 45-59              | Glargine    | 604                  | 8               | 0.26 (0.11, 0.52) | 606            | 12              | 0.38 (0.20, 0.67)    |
|                    | Glimepiride | 553                  | 6               | 0.22 (0.08, 0.47) | 555            | 13              | 0.46 (0.24, 0.78)    |
|                    | Liraglutide | 559                  | 3               | 0.11 (0.02, 0.31) | 562            | 6               | 0.20 (0.07, 0.44)    |
|                    | Sitagliptin | 602                  | 7               | 0.23 (0.09, 0.47) | 605            | 13              | 0.41 (0.22, 0.70)    |
| 60+                | Glargine    | 503                  | 12              | 0.48 (0.25, 0.84) | 505            | 27              | 1.05 (0.69, 1.53)    |
|                    | Glimepiride | 532                  | 10              | 0.37 (0.18, 0.69) | 534            | 30              | 1.11 (0.75, 1.58)    |
|                    | Liraglutide | 539                  | 6               | 0.23 (0.08, 0.49) | 546            | 21              | 0.77 (0.47, 1.17)    |
|                    | Sitagliptin | 511                  | 13              | 0.52 (0.28, 0.89) | 511            | 27              | 1.06 (0.70, 1.55)    |

(continued)

| Subgroups                     | Treatment   | Cardiovascular death |                 |                   | All deaths     |                 |                      |
|-------------------------------|-------------|----------------------|-----------------|-------------------|----------------|-----------------|----------------------|
|                               |             | N <sup>1</sup>       | Ne <sup>2</sup> | Rate (95% CI)     | N <sup>1</sup> | Ne <sup>2</sup> | Rate/100yrs (95% CI) |
| <b>BMI (kg/m<sup>2</sup>)</b> |             |                      |                 |                   |                |                 |                      |
| 18.2-30.7                     | Glargine    | 408                  | 6               | 0.29 (0.11, 0.63) | 409            | 14              | 0.66 (0.36, 1.11)    |
|                               | Glimepiride | 423                  | 4               | 0.19 (0.05, 0.48) | 425            | 12              | 0.56 (0.29, 0.97)    |
|                               | Liraglutide | 394                  | 4               | 0.20 (0.06, 0.52) | 400            | 11              | 0.53 (0.27, 0.95)    |
|                               | Sitagliptin | 444                  | 9               | 0.41 (0.19, 0.78) | 446            | 17              | 0.75 (0.44, 1.20)    |
| 30.7-36.3                     | Glargine    | 421                  | 5               | 0.24 (0.08, 0.56) | 424            | 12              | 0.55 (0.28, 0.96)    |
|                               | Glimepiride | 401                  | 4               | 0.20 (0.05, 0.50) | 403            | 14              | 0.67 (0.37, 1.12)    |
|                               | Liraglutide | 443                  | 2               | 0.09 (0.01, 0.32) | 446            | 9               | 0.39 (0.18, 0.74)    |
|                               | Sitagliptin | 406                  | 8               | 0.39 (0.17, 0.78) | 406            | 12              | 0.58 (0.30, 1.01)    |
| 36.3-74.3                     | Glargine    | 426                  | 10              | 0.47 (0.23, 0.87) | 428            | 15              | 0.68 (0.38, 1.12)    |
|                               | Glimepiride | 420                  | 8               | 0.38 (0.17, 0.76) | 423            | 17              | 0.79 (0.46, 1.26)    |
|                               | Liraglutide | 412                  | 3               | 0.15 (0.03, 0.43) | 414            | 7               | 0.33 (0.13, 0.67)    |
|                               | Sitagliptin | 412                  | 4               | 0.19 (0.05, 0.49) | 413            | 12              | 0.56 (0.29, 0.97)    |
| <b>HbA1c (%)</b>              |             |                      |                 |                   |                |                 |                      |
| 6.8-7.2                       | Glargine    | 474                  | 8               | 0.34 (0.15, 0.66) | 476            | 16              | 0.65 (0.37, 1.05)    |
|                               | Glimepiride | 494                  | 8               | 0.32 (0.14, 0.63) | 498            | 21              | 0.82 (0.51, 1.25)    |
|                               | Liraglutide | 496                  | 5               | 0.20 (0.07, 0.47) | 498            | 12              | 0.47 (0.24, 0.82)    |
|                               | Sitagliptin | 465                  | 4               | 0.17 (0.05, 0.44) | 466            | 14              | 0.58 (0.32, 0.98)    |
| 7.2-7.7                       | Glargine    | 389                  | 9               | 0.46 (0.21, 0.87) | 391            | 14              | 0.69 (0.38, 1.16)    |
|                               | Glimepiride | 399                  | 5               | 0.25 (0.08, 0.59) | 400            | 14              | 0.69 (0.38, 1.16)    |
|                               | Liraglutide | 370                  | 3               | 0.16 (0.03, 0.46) | 374            | 10              | 0.51 (0.25, 0.94)    |
|                               | Sitagliptin | 411                  | 7               | 0.34 (0.14, 0.69) | 412            | 13              | 0.61 (0.32, 1.04)    |
| 7.7-8.5                       | Glargine    | 394                  | 4               | 0.21 (0.06, 0.53) | 396            | 12              | 0.59 (0.31, 1.04)    |
|                               | Glimepiride | 354                  | 3               | 0.17 (0.04, 0.50) | 356            | 8               | 0.44 (0.19, 0.86)    |
|                               | Liraglutide | 385                  | 1               | 0.05 (0.00, 0.29) | 390            | 5               | 0.25 (0.08, 0.58)    |
|                               | Sitagliptin | 388                  | 10              | 0.52 (0.25, 0.96) | 389            | 14              | 0.71 (0.39, 1.20)    |

(continued)

| Subgroups                            | Treatment   | Cardiovascular death |                 |                   | All deaths     |                 |                      |
|--------------------------------------|-------------|----------------------|-----------------|-------------------|----------------|-----------------|----------------------|
|                                      |             | N <sup>1</sup>       | Ne <sup>2</sup> | Rate (95% CI)     | N <sup>1</sup> | Ne <sup>2</sup> | Rate/100yrs (95% CI) |
| <b>Diabetes Duration (yrs)</b>       |             |                      |                 |                   |                |                 |                      |
| 0-2.5                                | Glargine    | 411                  | 9               | 0.45 (0.20, 0.85) | 413            | 15              | 0.72 (0.40, 1.18)    |
|                                      | Glimepiride | 415                  | 7               | 0.34 (0.14, 0.70) | 418            | 16              | 0.75 (0.43, 1.21)    |
|                                      | Liraglutide | 431                  | 3               | 0.14 (0.03, 0.42) | 434            | 9               | 0.41 (0.19, 0.78)    |
|                                      | Sitagliptin | 424                  | 7               | 0.33 (0.13, 0.68) | 425            | 15              | 0.69 (0.38, 1.13)    |
| 2.5-5.4                              | Glargine    | 458                  | 7               | 0.30 (0.12, 0.61) | 460            | 13              | 0.53 (0.28, 0.91)    |
|                                      | Glimepiride | 390                  | 5               | 0.25 (0.08, 0.58) | 390            | 15              | 0.73 (0.41, 1.21)    |
|                                      | Liraglutide | 389                  | 3               | 0.15 (0.03, 0.44) | 395            | 7               | 0.34 (0.13, 0.69)    |
|                                      | Sitagliptin | 427                  | 8               | 0.37 (0.16, 0.73) | 428            | 10              | 0.45 (0.21, 0.82)    |
| 5.4-11.2                             | Glargine    | 388                  | 5               | 0.26 (0.09, 0.61) | 390            | 14              | 0.71 (0.39, 1.19)    |
|                                      | Glimepiride | 442                  | 4               | 0.18 (0.05, 0.47) | 446            | 12              | 0.54 (0.28, 0.94)    |
|                                      | Liraglutide | 431                  | 3               | 0.14 (0.03, 0.41) | 433            | 11              | 0.50 (0.25, 0.89)    |
|                                      | Sitagliptin | 412                  | 6               | 0.30 (0.11, 0.64) | 413            | 16              | 0.77 (0.44, 1.26)    |
| <b>Stroke/MI History<sup>3</sup></b> |             |                      |                 |                   |                |                 |                      |
| No                                   | Glargine    | 1177                 | 18              | 0.31 (0.18, 0.48) | 1183           | 36              | 0.59 (0.41, 0.81)    |
|                                      | Glimepiride | 1172                 | 14              | 0.24 (0.13, 0.40) | 1178           | 35              | 0.58 (0.40, 0.81)    |
|                                      | Liraglutide | 1174                 | 8               | 0.14 (0.06, 0.27) | 1185           | 25              | 0.41 (0.26, 0.60)    |
|                                      | Sitagliptin | 1173                 | 15              | 0.26 (0.14, 0.42) | 1176           | 32              | 0.53 (0.36, 0.75)    |
| Yes                                  | Glargine    | 80                   | 3               | 0.79 (0.16, 2.32) | 80             | 6               | 1.55 (0.57, 3.38)    |
|                                      | Glimepiride | 75                   | 2               | 0.54 (0.07, 1.97) | 76             | 8               | 2.07 (0.89, 4.08)    |
|                                      | Liraglutide | 77                   | 1               | 0.27 (0.01, 1.48) | 77             | 2               | 0.53 (0.06, 1.90)    |
|                                      | Sitagliptin | 91                   | 6               | 1.36 (0.50, 2.95) | 91             | 9               | 1.97 (0.90, 3.73)    |

<sup>1</sup>Number at risk; <sup>2</sup>Number of events

<sup>3</sup>Post-hoc analysis of those who had a history of stroke or MI  $\geq$  1 year before randomization. Stroke within 1 year of randomization was a study exclusion criteria. Note that all subgroup factors were assessed at baseline.
